# Supplementary material for: A nascent polypeptide sequence modulates DnaA translation elongation in response to nutrient availability
Source: eLife journal article supplement (doi:10.7554/elife.71611), 2021-08-31
Supplement: fig1-figsupp2-data1 [file ViennaRNA_SD_analysis.xlsx]

## Sheet: Theoretical
Position on genome		5 vs 8 nt sliding window	6 vs 8 nt sliding window	8 vs 8 nt sliding window
5481	C
5482	T						5=	CCUCC
5483	C						6=	CCUCCU
5484	A						8=	CACCUCCU
5485	A	3.09
5486	C	2.97	2.97
5487	G	1.45	1.44
5488	C	0.96	0.95	0.95
5489	T	0.97	0.95	0.94
5490	C	0.96	0.96	0.94
5491	T	1.06	0.96	0.94
5492	T	3.44	1.05	0.95
5493	C	3.31	3.29	0.95
5494	C	3.53	3.31	1.05
5495	A	3.39	3.38	3.19
5496	G	0.96	0.96	0.96
5497	T	0.05	0.05	0.06
5498	C	-0.1	-0.1	-0.1
5499	T	0.05	-0.1	-0.1
5500	T	0.34	0.05	-0.1
5501	G	1.22	0.2	-0.18
5502	G	-1.65	-1.65	-1.71
5503	A	-3.18	-3.18	-3.18
5504	T	-3.66	-3.66	-3.65
5505	A	-3.64	-3.66	-3.66
5506	A	-0.02	-3.64	-3.66
5507	A	2.7	-0.02	-3.66
5508	A	2.58	2.51	-3.64
5509	C	2.66	2.52	-0.03
5510	A	2.85	2.62	2.44
5511	A	2.87	2.63	2.36
5512	G	0.91	0.9	0.88
5513	G	-2.68	-2.69	-2.69
5514	C	-3.33	-3.33	-3.33
5515	G	-3.06	-3.54	-3.54
5516	G	-5.12	-5.68	-5.89
5517	C	-2.58	-5.8	-6.56
5518	G	-2.59	-2.79	-6.51
5519	G	-5.12	-5.26	-6.73
5520	C	-2.58	-5.8	-5.13
5521	G	-2.59	-2.79	-5.93
5522	G	-5.12	-5.26	-6.73
5523	A	-3.35	-5.76	-5.87
5524	C	-3.68	-3.71	-5.88
5525	C	-3.53	-3.68	-5.62
5526	C	0.04	-3.53	-3.7
5527	A	3.83	0.04	-3.67
5528	T	3.46	3.31	-3.52
5529	C	3.32	3.32	0.04
5530	G	1.47	1.47	1.46
5531	T	0.39	0.39	0.39
5532	G	-1.8	-1.8	-1.79
5533	T	-2.45	-2.45	-2.44
5534	T	-2.18	-2.45	-2.45
5535	C	0.28	-2.18	-2.45
5536	G	0.29	0.2	-2.36
5537	C	0.97	0.19	-2.15
5538	C	0.97	0.97	0.11
5539	G	0.75	0.74	0.12
5540	A	-0.05	-0.08	-0.07
5541	G	-2.23	-2.24	-2.23
5542	T	-2.99	-2.99	-2.98
5543	A	-2.74	-3.01	-3.01
5544	A	-0.08	-2.74	-3.01
5545	G	0.03	-0.2	-3.01
5546	A	-0.43	-0.63	-2.77
5547	A	-0.63	-0.64	-0.86
5548	C	-0.44	-0.64	-0.78
5549	C	-0.14	-0.44	-0.64
5550	T	3.25	-0.14	-0.63
5551	G	1.3	1.28	-0.48
5552	T	0.41	0.4	-0.38
5553	G	-1.5	-1.5	-1.5
5554	T	-2.15	-2.15	-2.14
5555	G	-2.5	-2.49	-2.49
5556	C	-1.93	-2.73	-2.72
5557	G	-1.97	-1.94	-2.72
5558	T	-0.06	-1.99	-2.73
5559	T	-0.19	-0.23	-1.98
5560	G	-0.04	-0.37	-2.01
5561	A	-0.62	-0.74	-0.98
5562	G	-1.94	-1.99	-2.04
5563	A	-3.24	-3.24	-3.23
5564	A	-3.27	-3.24	-3.26
5565	A	-0.44	-3.27	-3.24
5566	A	-0.15	-0.44	-3.24
5567	A	2.53	-0.15	-3.27
5568	C	2.66	2.48	-0.45
5569	G	1.43	1.41	-0.18
5570	G	-1.75	-1.75	-1.76
5571	T	-3.2	-3.2	-3.21
5572	C	3.56	-3.56	-3.57
5573	G	-3.48	-3.63	-3.63
5574	C	0.07	-3.58	-3.72
5575	G	0.64	-0.05	-3.57
5576	C	0.36	0.35	-3.6
5577	G	0.24	0.17	-0.19
5578	C	0.36	0.04	-0.03
5579	C	0.45	0.36	-0.02
5580	A	0.98	0.45	0.05
5581	T	1.06	0.97	0.35
5582	G	1.25	0.72	0.29
5583	G	-1.66	-1.65	-1.65
5584	G	-3.25	-3.25	-3.2
5585	G	5.53	-5.53	-5.12
5586	G	-8.86	-8.88	-8.87
5587	G	-8.86	-10.22	-10.27
5588	C	-6.08	-9.53	-10.56
5589	G	-3.62	-6.27	-10.52
5590	G	-5.12	-5.87	-10.43
5591	C	-2.58	-5.8	-7.38
5592	G	-2.59	-2.79	-6.62
5593	G	-5.12	-5.26	-6.73
5594	C	-2.58	-5.8	-5.13
5595	T	-2.36	-2.58	-5.91
5596	G	-2.43	-2.58	-5.99
5597	A	-0.47	-3.07	-3.45
5598	G	-1.94	-1.97	-3.28
5599	G	-5.76	-5.75	-5.81
5600	G	-6.98	-6.95	-6.95
5601	A	-4.43	-7.09	-7.04
5602	T	-4.38	-4.69	-7.06
5603	G	-3.86	-4.57	-7.1
5604	C	-0.47	-4.12	-5.09
5605	G	0.55	-0.57	-4.81
5606	G	-1.95	-1.95	-4.81
5607	C	-2.58	-2.57	-2.63
5608	G	-2.59	-2.79	-2.79
5609	A	3.18	-3.32	-3.49
5610	T	-0.51	-3.18	-3.5
5611	T	-0.19	-0.51	-3.33
5612	G	-0.11	-0.26	-3.19
5613	T	0.36	-0.35	-0.71
5614	T	0.24	0.23	-0.54
5615	T	0.28	0.23	-0.41
5616	T	0.38	0.28	0.23
5617	T	3.05	0.38	0.23
5618	G	1.22	1.21	0.16
5619	T	0.36	0.36	-0.06
5620	G	-1.5	-1.5	-1.5
5621	C	-1.93	-1.94	-1.94
5622	A	-1.96	-1.93	-1.94
5623	A	0.82	-1.96	-1.94
5624	G	0.55	0.44	-1.94
5625	G	-2.68	-2.71	-2.87
5626	C	-3.33	-3.33	-3.32
5627	G	-3.06	-3.54	-3.03
5628	G	-5.12	-5.68	-5.89
5629	T	-3.45	-6.76	-7.52
5630	G	-5.65	-5.92	-9.83
5631	G	-6.94	-7.08	-10.66
5632	A	-3.53	-7.01	-7.35
5633	C	-3.56	-3.77	-7.11
5634	G	-3.75	-3.78	-6.91
5635	A	-0.61	-4.15	-4.25
5636	A	-0.34	-0.78	-4.17
5637	T	-0.33	-0.34	-4.15
5638	G	-0.22	-0.39	-0.81
