# Supplementary material for: A nascent polypeptide sequence modulates DnaA translation elongation in response to nutrient availability
Source: eLife journal article supplement (doi:10.7554/elife.71611), 2021-08-31
Supplement: fig4-figsupp2-data1 [file Growth_curves_GFP_stab_assay.xlsx]

## Sheet: GC
	time (h)	OD600 Nt rep1	OD600 Nt rep2	OD600 Nt rep3	OD600 delta_Nt rep1	OD600 delta_Nt rep2	OD600 delta_Nt rep2
	0	0.098	0.1	0.097	0.1	0.099	0.099
	1	0.126	0.122	0.118	0.13	0.122	0.123
	2	0.172	0.159	0.156	0.181	0.162	0.165
	3	0.222	0.202	0.199	0.232	0.207	0.208
	4	0.259	0.238	0.237	0.265	0.238	0.242
	5	0.271	0.251	0.249	0.275	0.25	0.25
	6	0.27	0.253	0.251	0.275	0.253	0.252
	7	0.271	0.256	0.252	0.275	0.251	0.256
