# Supplementary material for: A nascent polypeptide sequence modulates DnaA translation elongation in response to nutrient availability
Source: eLife journal article supplement (doi:10.7554/elife.71611), 2021-08-31
Supplement: fig4-figsupp2-data1 [file Quantification.xlsx]

## Sheet: Sheet1
time after shut-off	Nt_rep1 Area	Nt_rep1 normalised	delta_Nt_rep1 Area	delta_Nt_rep1 normalised	Nt_rep2 Area	Nt_rep2 normalised	delta_Nt_rep2 Area	delta_Nt_rep2 normalised	Nt_rep3 Area	Nt_rep3 normalised	delta_Nt_rep3 Area	delta_Nt_rep3 normalised
0	10630.8	1	6767.54	1	8435.09	1	9609.02	1	9525.09	1	9321.75	1
10	9589.85	0.902082	7058	1.04292	8260.15	0.979259	10274.9	1.06929	9868.85	1.03609	10201.6	1.09439
20	10458.7	0.983814	7130.02	1.05356	7880.73	0.934279	10026.7	1.04347	10832.4	1.13725	9844.29	1.05606
30	8870.44	0.834409	7681.78	1.13509	8632.68	1.02342	9719.44	1.01149	9826.02	1.03159	10201.5	1.09438
45	8167.49	0.768285	8148.83	1.20411	10142.8	1.20245	10328.9	1.07491	9695.02	1.01784	10377.4	1.11324
60	6582.78	0.619218	6100.59	0.901449	10931.5	1.29595	8494.32	0.883994	10542.5	1.10681	10022.8	1.07521
90	7425.54	0.698493	6181.76	0.913443	9954.05	1.18008	8402.66	0.874455	10199.3	1.07078	10511.1	1.12759
