# Supplementary material for: A nascent polypeptide sequence modulates DnaA translation elongation in response to nutrient availability
Source: eLife. 2021 Sep 15;10:e71611. doi: 10.7554/eLife.71611 (PMC8443254; doi:10.7554/eLife.71611)
Supplement: Supplementary file 1. [file elife-71611-supp1.docx]

**Supplementary file 1**

**pMR10 and pZE12 reporter plasmids construction**

**Supplementary file 1A. The pMR10-BG construct.** The pMR10-BG plasmid was derived from pMR10 (Roberts et al., 1996) by exchanging *lacZα* and *oriT* with a multicloning site. Grey: flanking sequences of the parental pMR10 plasmid. Red: HindIII and BamHI restriction sites.

**
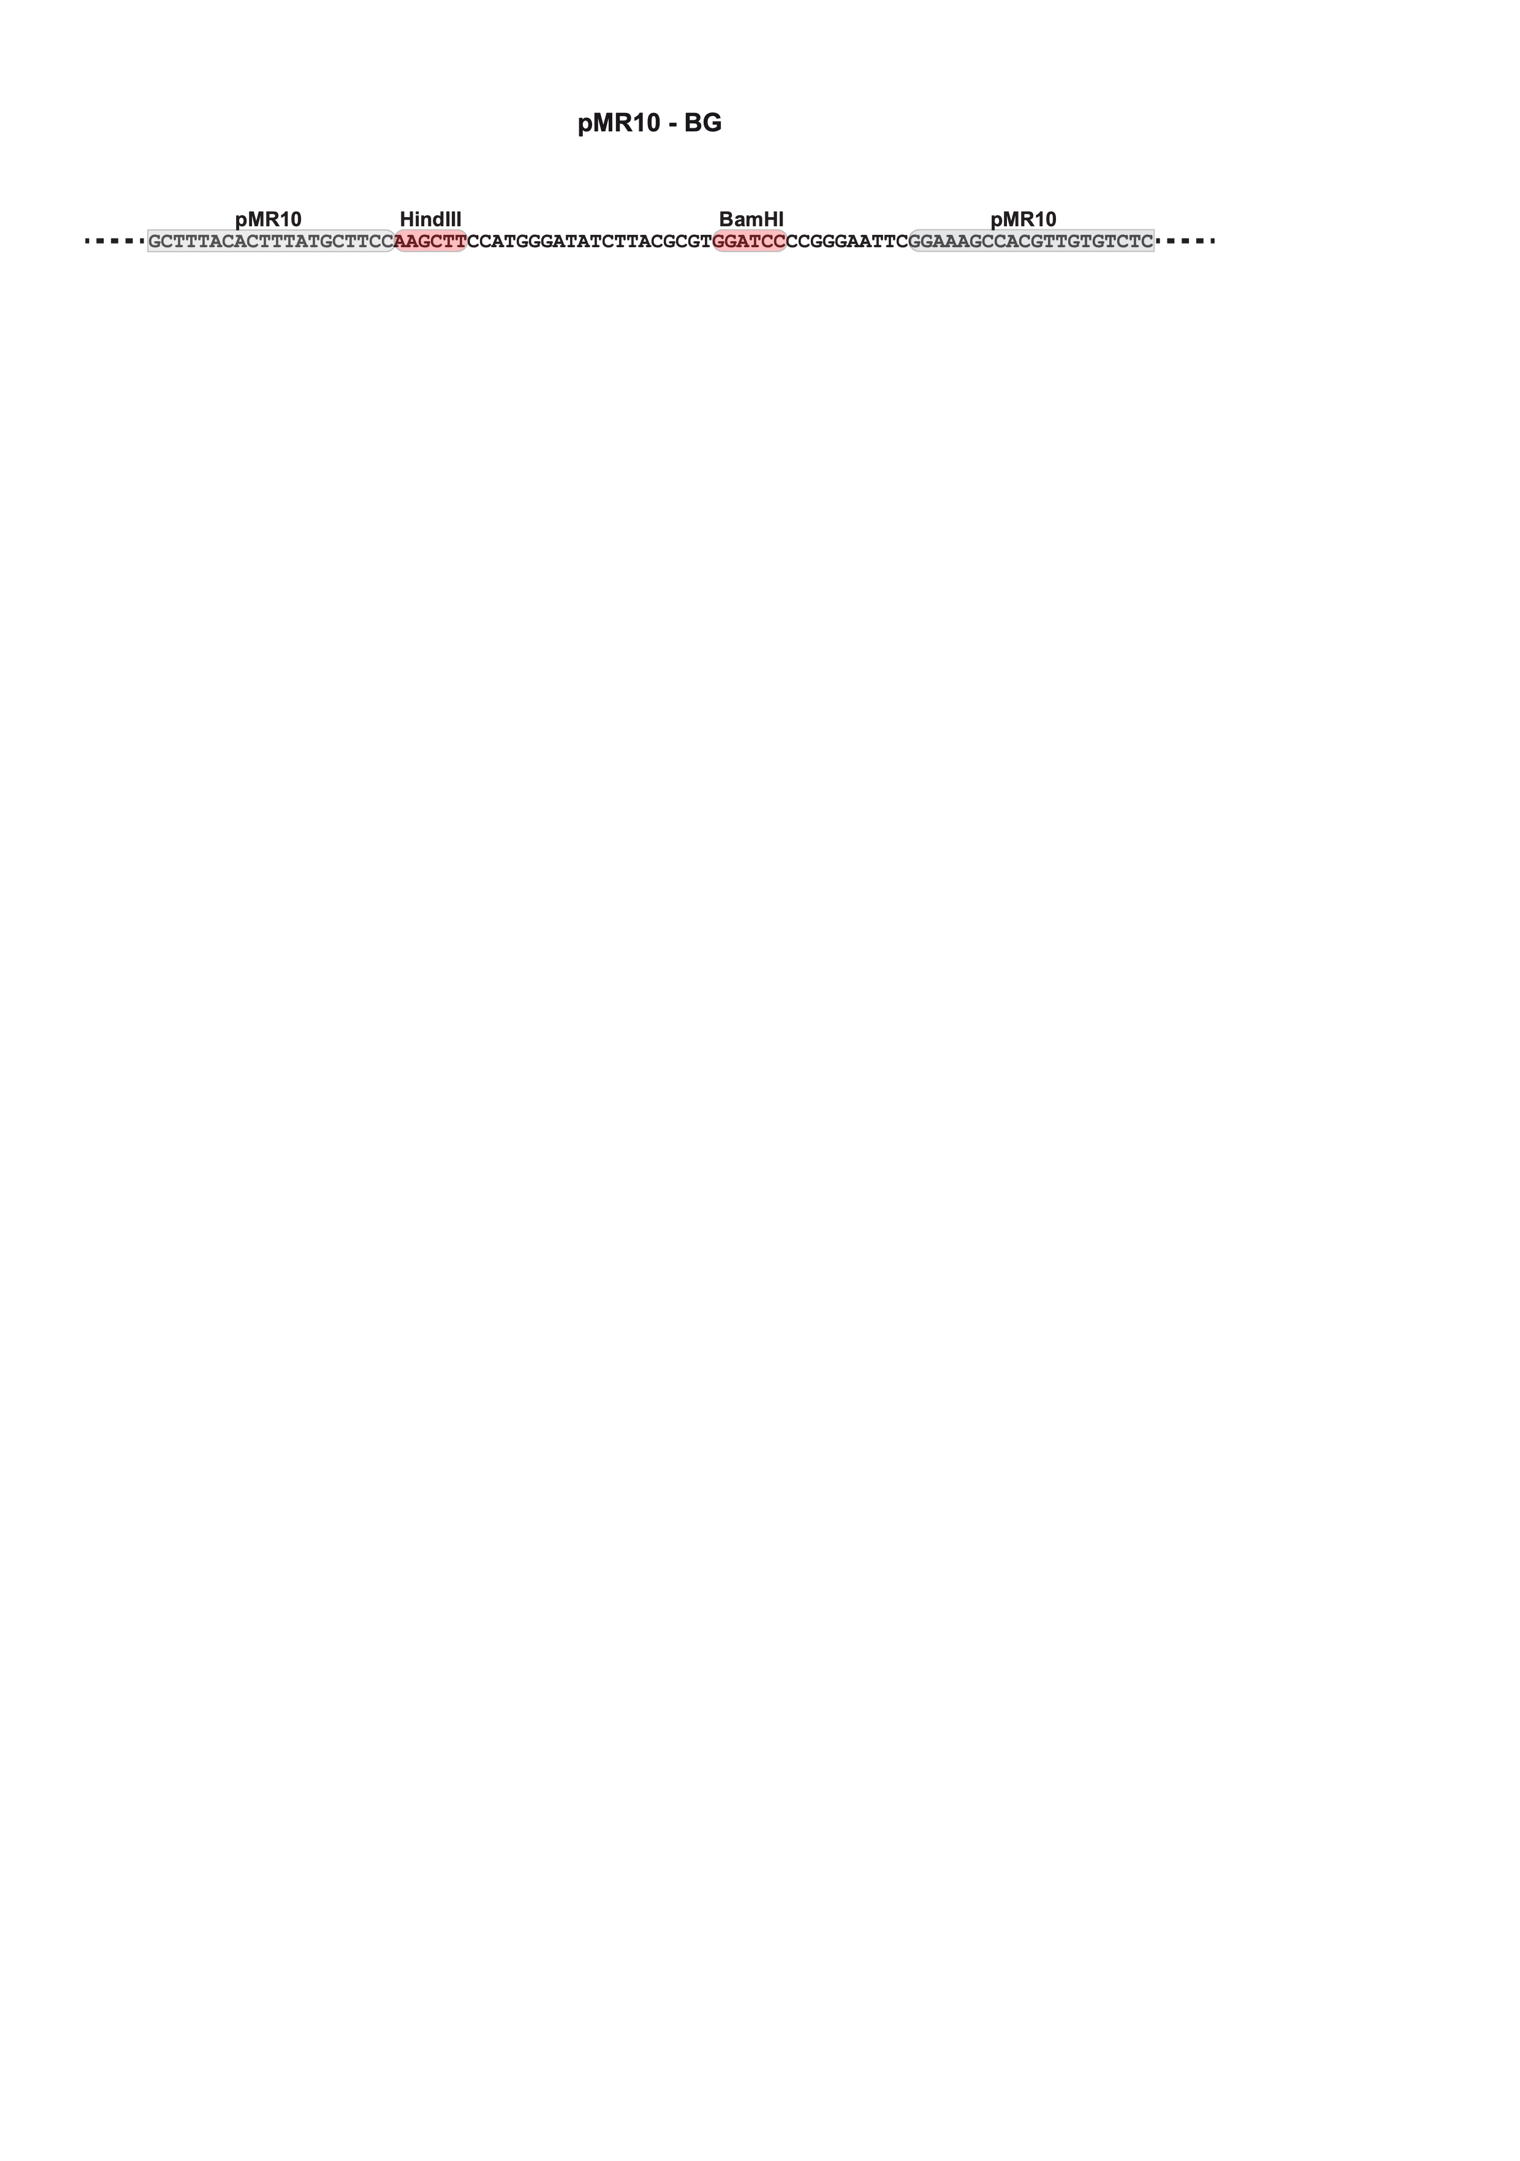
**

**Supplementary file 1B. The pMR10-*PdnaA*-5'UTR*dnaA*-Nt-eGFP construct.** The pMR10-*PdnaA*-5'UTR*dnaA*-Nt-eGFP reporter plasmid was derived upon digestion of pMR10-BG with HindIII and BamHI (restriction sites in red). The insert comprised, the *rrnB1*-T1T2 terminator (yellow), 245 bp upstream of the *dnaA* transcription start site (*PdnaA* - purple), the 5'UTR*dnaA* (blue), the first 78 bp of *dnaA* open reading frame (orange), the eGFP gene (green) and 63 bp downstream of the *dnaA* stop codon (3'UTR*dnaA* - pink).

**
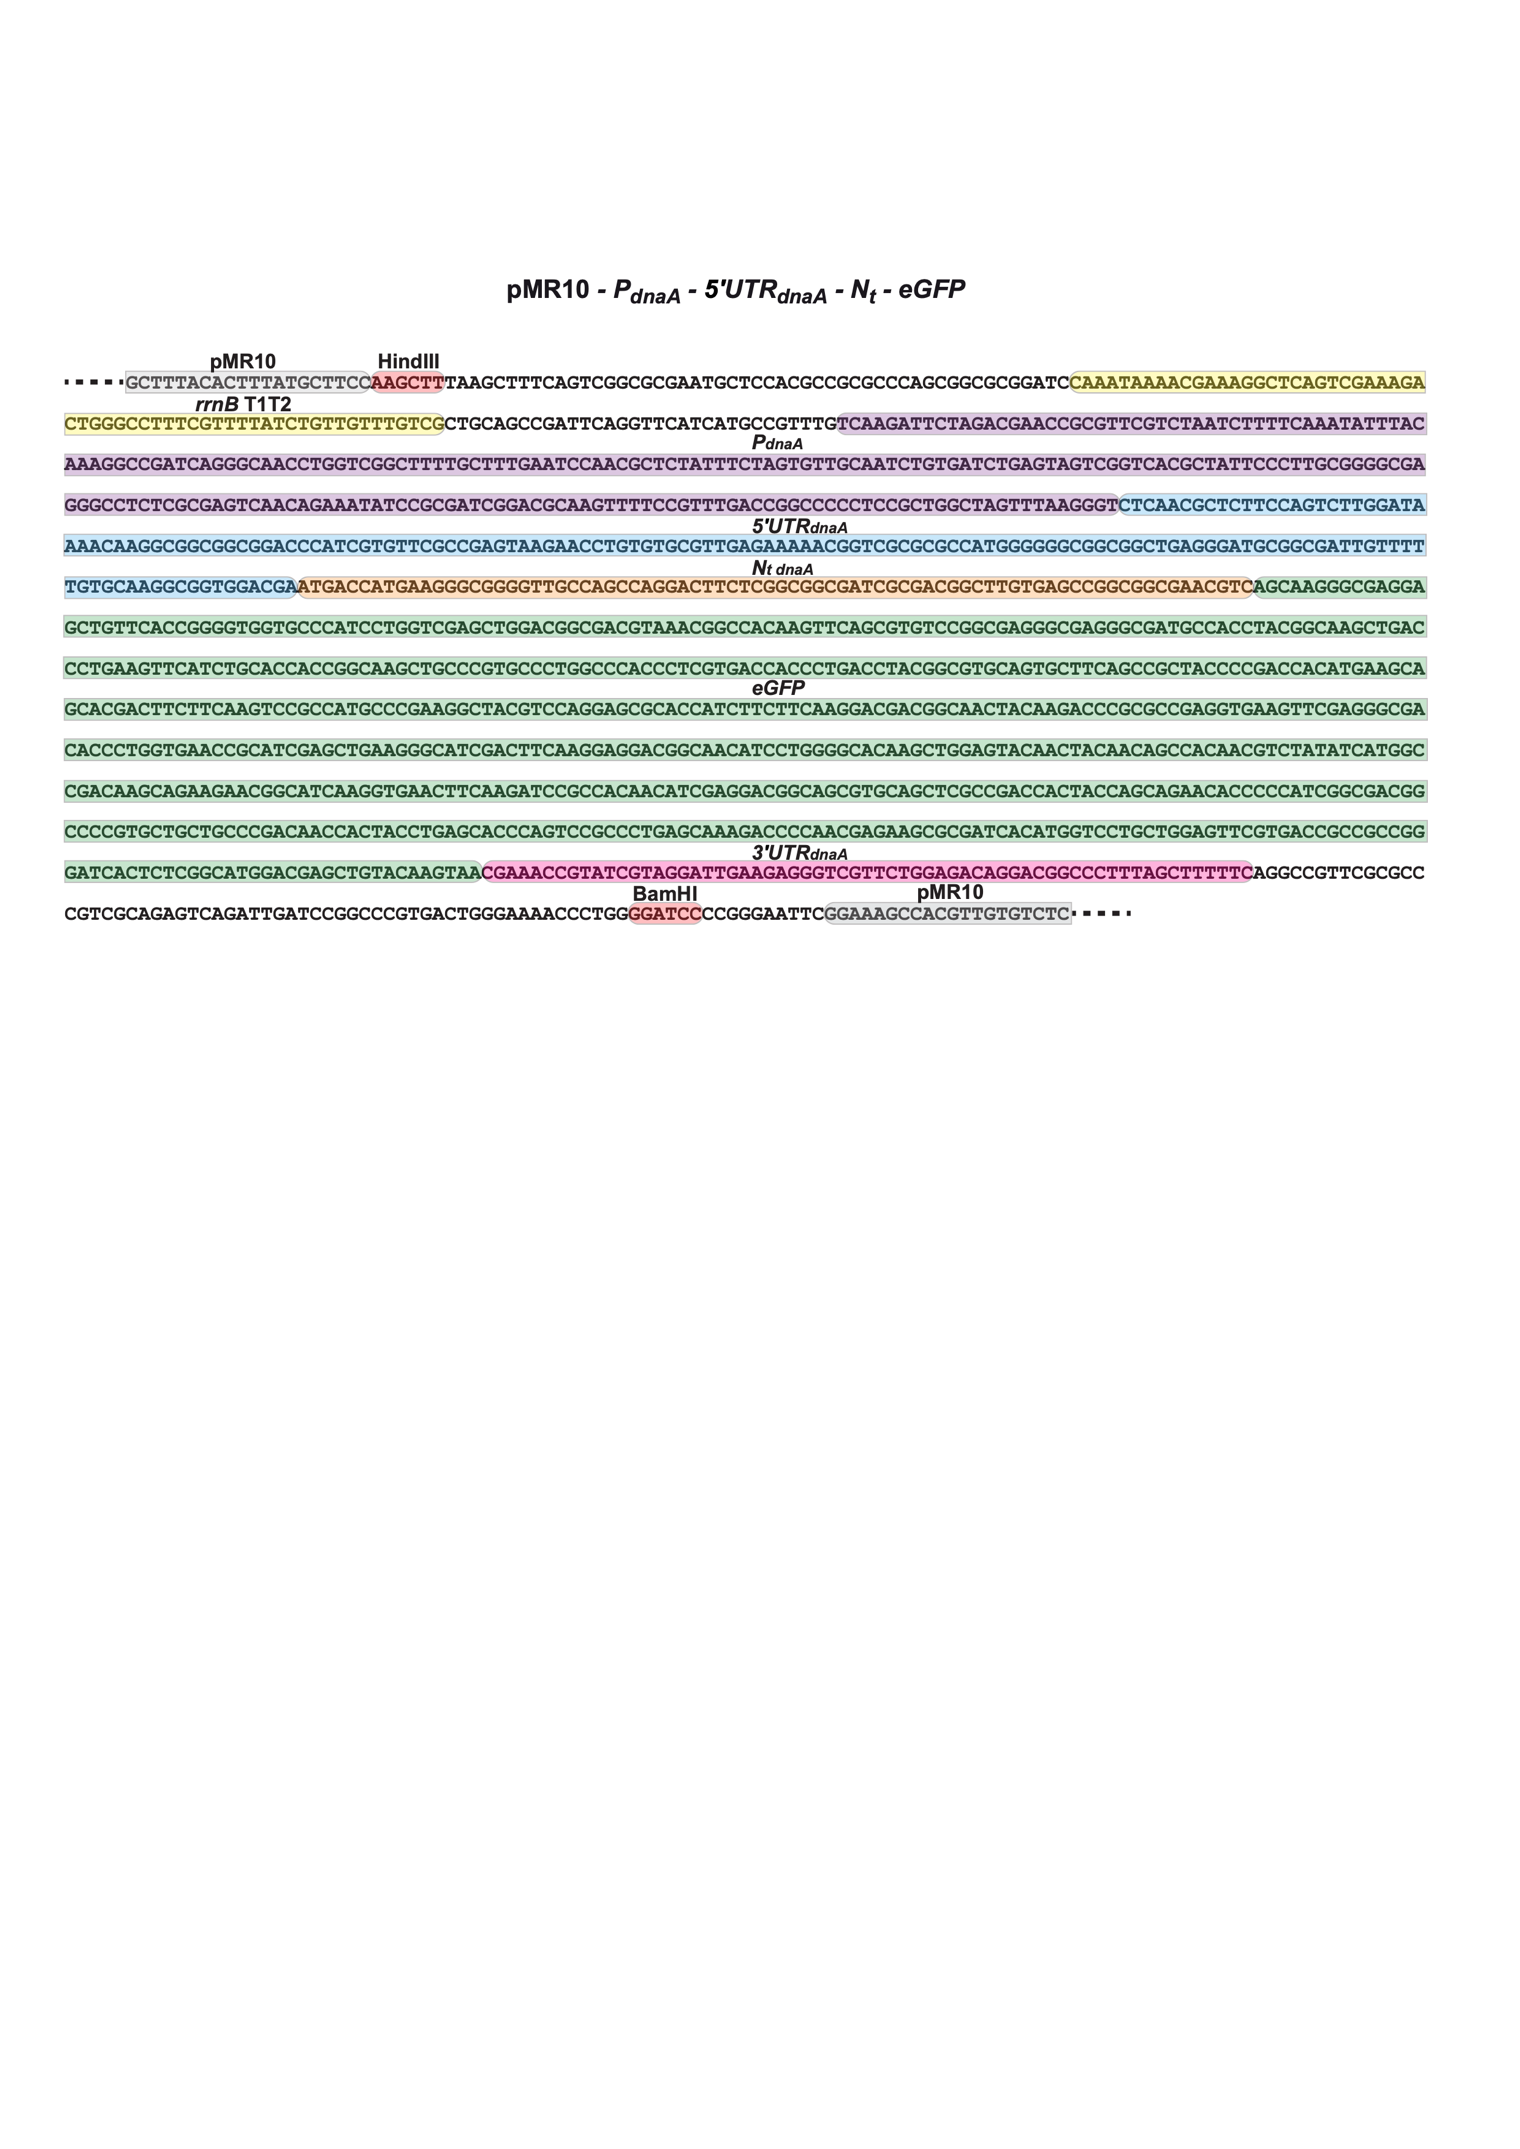
**

**Supplementary file 1C. The pZE12-BG construct.** Plasmid pZE12-BG was derived from the pZE12-luc plasmid by deleting the luciferase gene and part of the *PλO1*promoter. In grey, the flanking sequences of the original pZE12-luc plasmid.

**
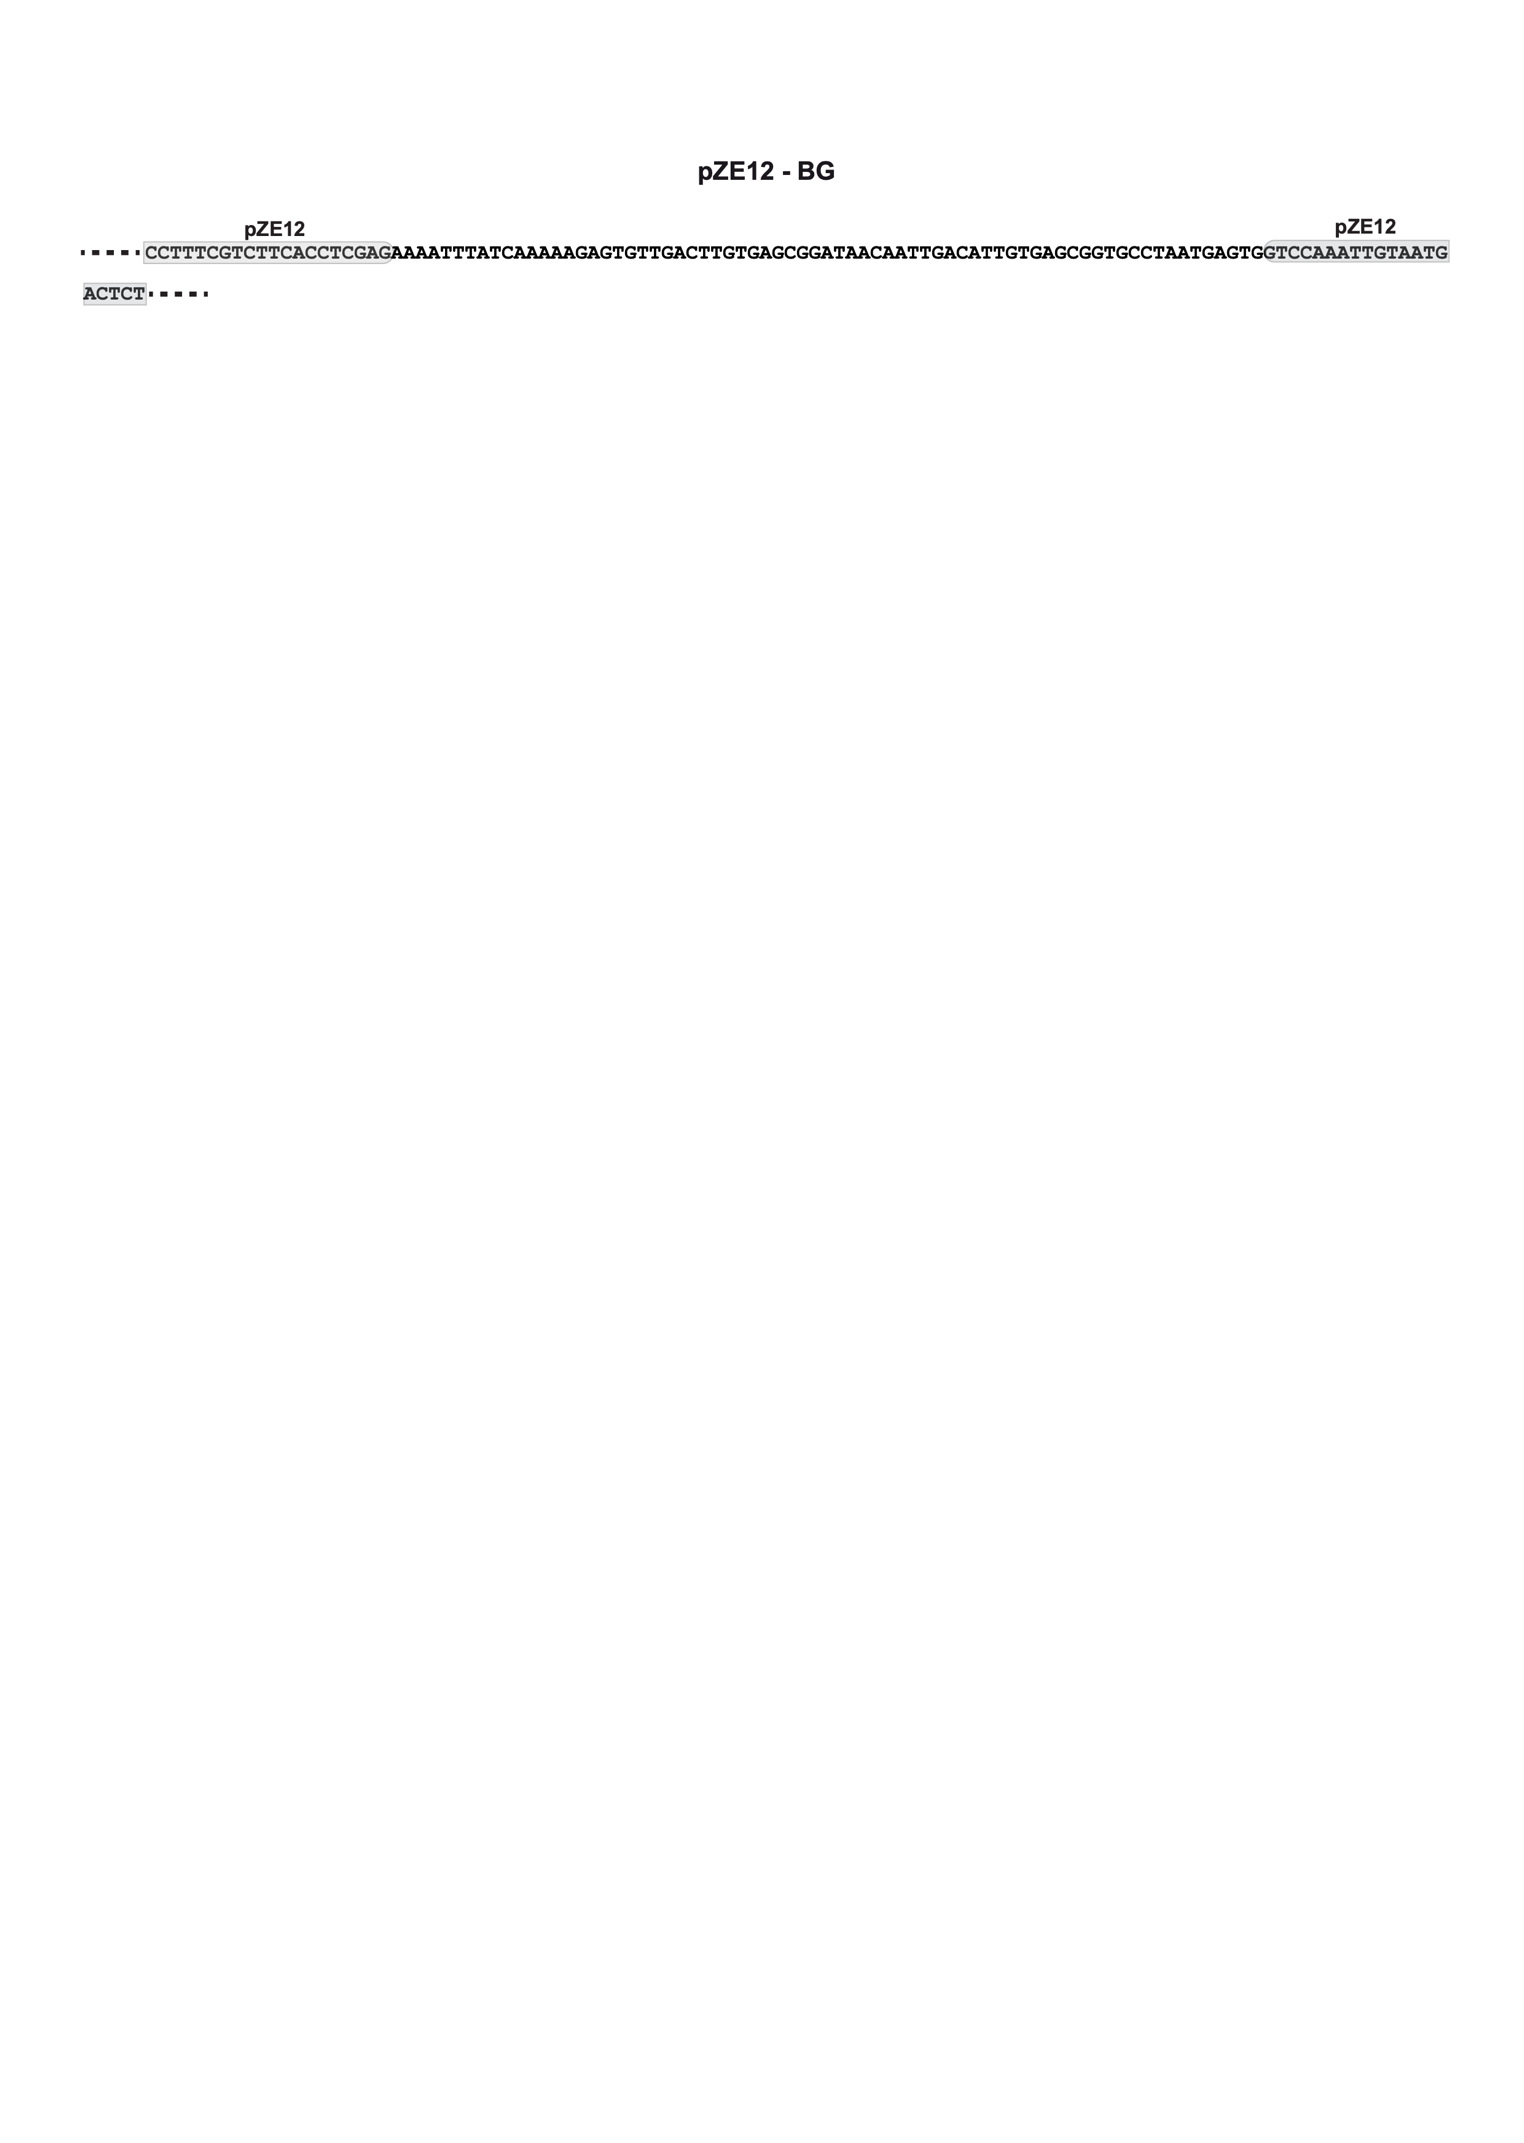
**

**Supplementary file 1D.** **The pZE12-*P*λO1-5'UTR*dnaA*-Nt-eGFP construct.** The pZE12-*P*λO1-5'UTR*dnaA*-Nt-eGFP reporter plasmid, was obtained from the pZE12-luc plasmid by exchanging the luciferase gene downstream of the Lambda O1 promoter (*PλO1*– purple) with an insert containing the 5'UTR*dnaA* (blue), the first 78 nt of *dnaA* open reading frame (orange), the eGFP gene (green) and the 3'UTR*dnaA* (pink).

**
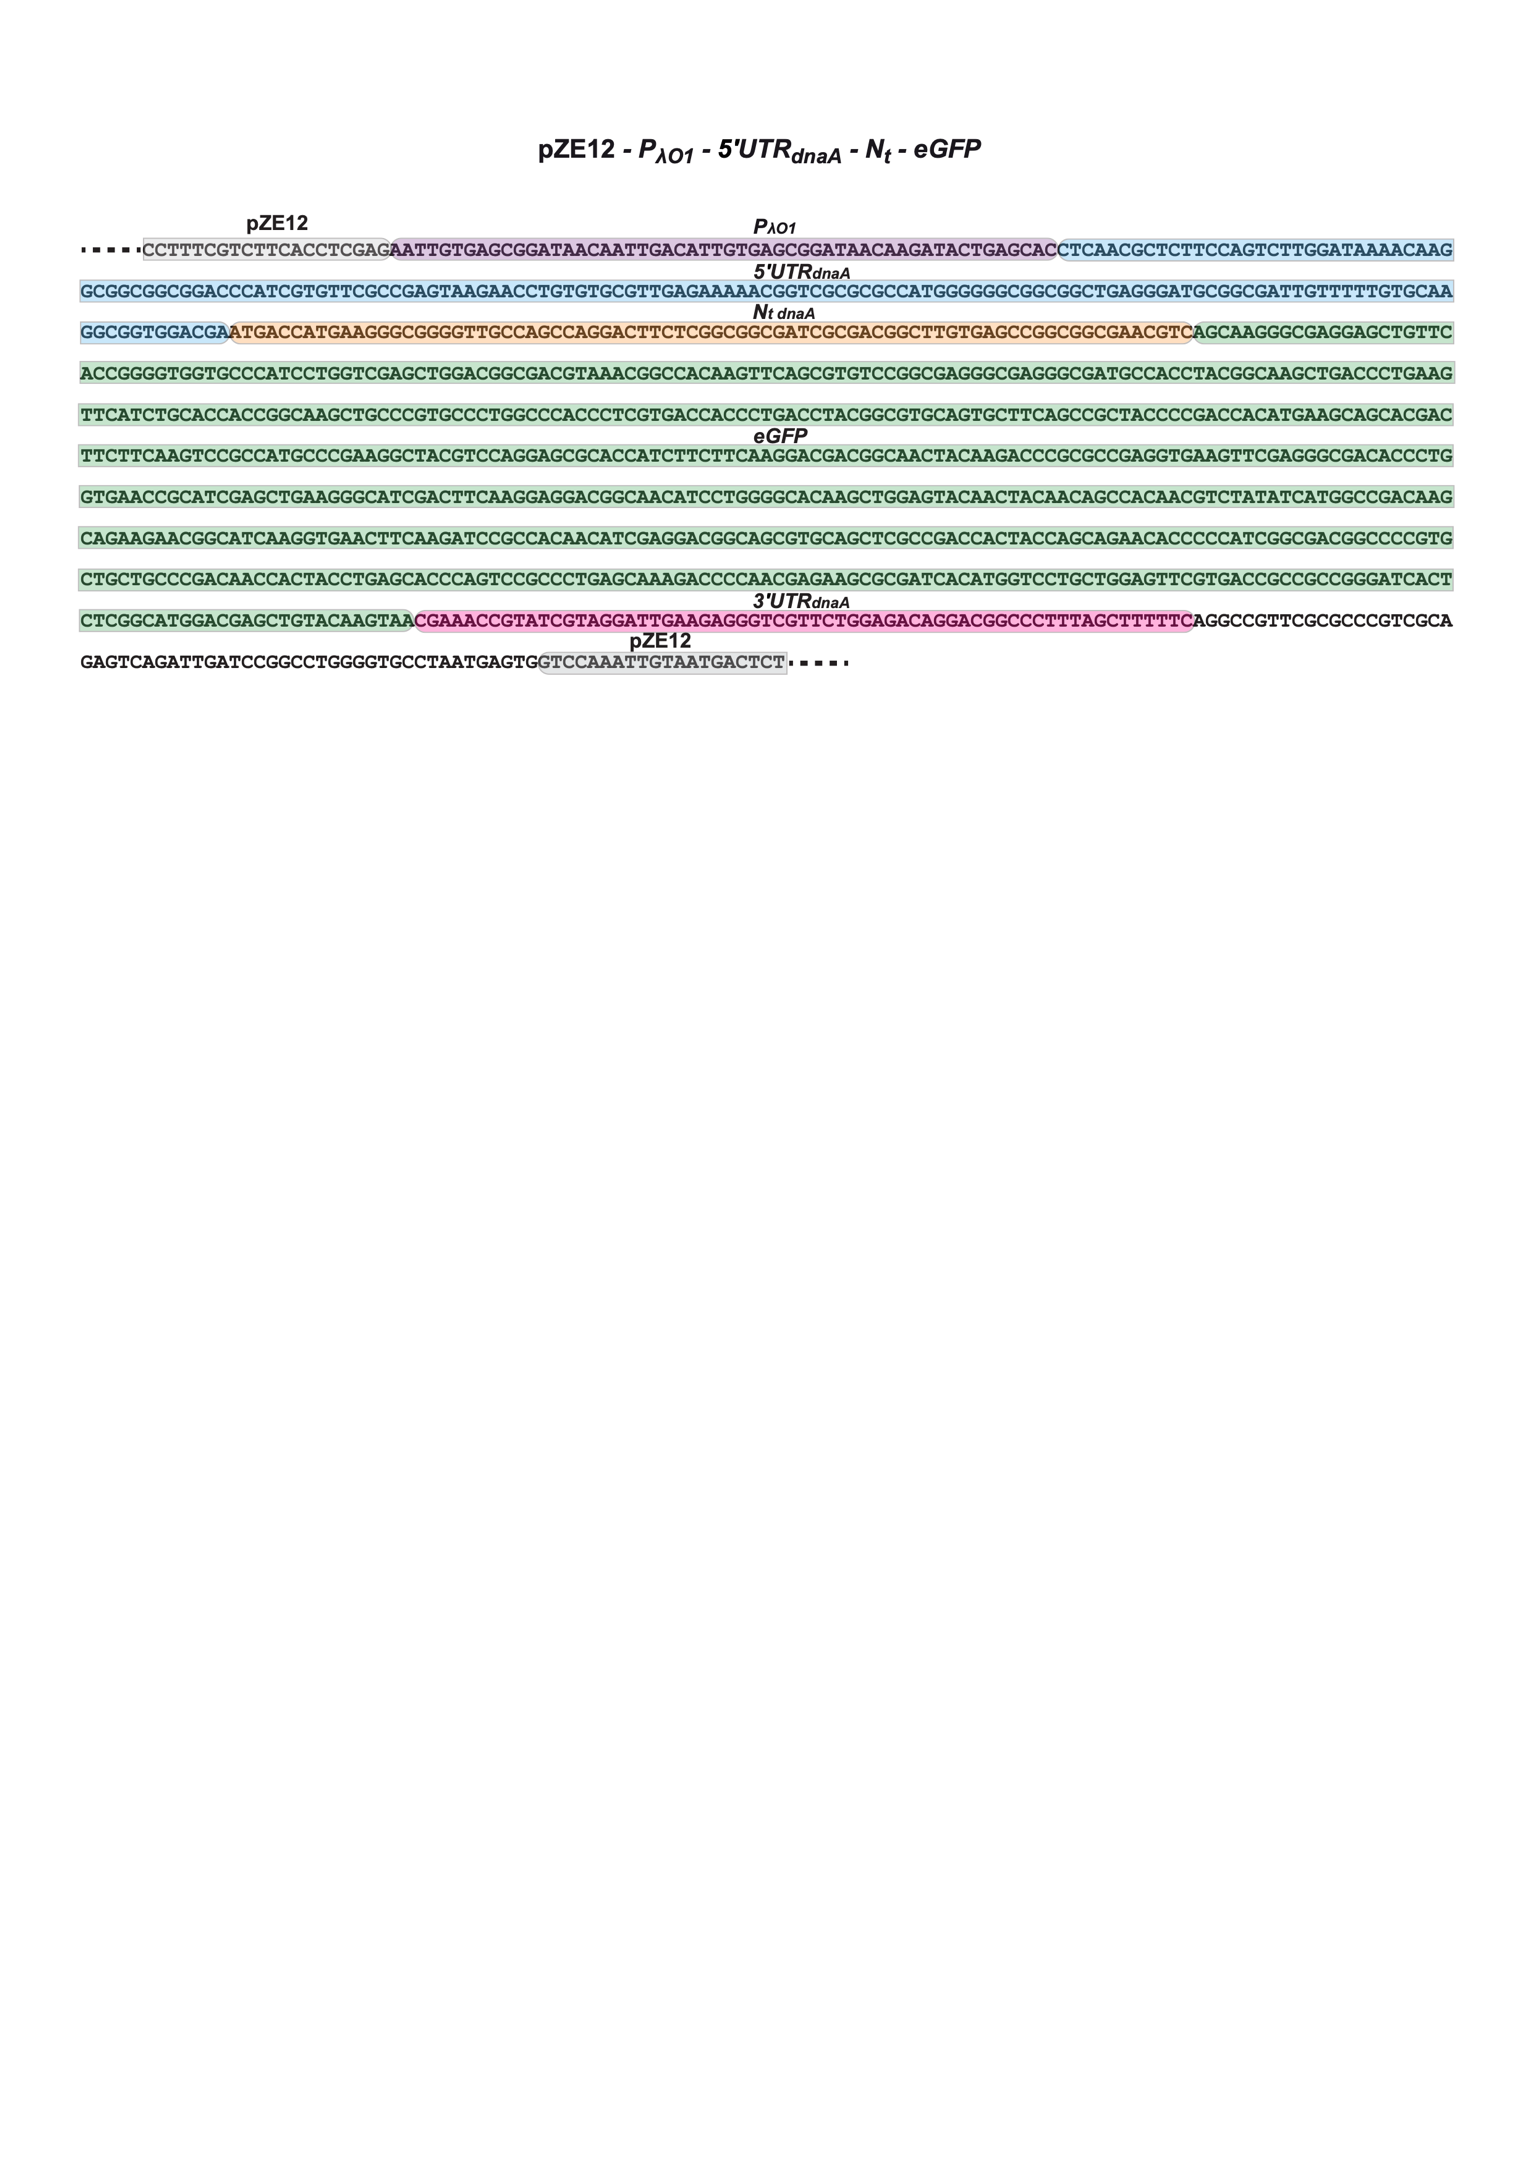
**

**Supplementary file 1E.** **Sequence of the 5**′**UTR and Nt modules in the reporter plasmid constructs.** The reporter plasmids were generated by site-directed mutagenesis, using the 5′UTR*dnaA*-Nt constructs as a PCR template (Supplementary file 1B and 1D). The sequences of the 5′UTR and Nt regions are shown in blue and orange respectively. Nucleotide substitutions and insertions are indicated in bold. Nucleotide deletions are indicated with the symbol “ – ”.

| **Strain** | **5′UTR-Nt sequence** |
| --- | --- |
| 5′UTR*dnaA*-Nt | CTCAACGCTCTTCCAGTCTTGGATAAAACAAGGCGGCGGCGGACCCATCGTGTTCGCCGAGTAAGAACCTGTGTGCGTTGAGAAAAACGGTCGCGCGCCATGGGGGGCGGCGGCTGAGGGATGCGGCGATTGTTTTTGTGCAAGGCGGTGGACGAATGACCATGAAGGGCGGGGTTGCCAGCCAGGACTTCTCGGCGGCGATCGCGACGGCTTGTGAGCCGGCGGCGAACGTC |
| 5′UTR*dnaA*-ΔNt | CTCAACGCTCTTCCAGTCTTGGATAAAACAAGGCGGCGGCGGACCCATCGTGTTCGCCGAGTAAGAACCTGTGTGCGTTGAGAAAAACGGTCGCGCGCCATGGGGGGCGGCGGCTGAGGGATGCGGCGATTGTTTTTGTGCAAGGCGGTGGACGAATG------------------------------------------------------------------------GT**G** |
| 5′UTR*6/13*-Nt | **CACCAGGAGGAACAACAACT**ATGACCATGAAGGGCGGGGTTGCCAGCCAGGACTTCTCGGCGGCGATCGCGACGGCTTGTGAGCCGGCGGCGAACGTC |
| 5′UTR*6/13*-ΔNt | **CACCAGGAGGAACAACAACT**ATG------------------------------------------------------------------------GT**G** |
| 5′UTR*lac*-Nt | **AATTGTGAGCGGATAACAATTTCACACAGGAAACAGCT**ATGACCATGAAGGGCGGGGTTGCCAGCCAGGACTTCTCGGCGGCGATCGCGACGGCTTGTGAGCCGGCGGCGAACGTC |
| 5′UTR*lac*-ΔNt | **AATTGTGAGCGGATAACAATTTCACACAGGAAACAGCT**ATG------------------------------------------------------------------------GT**G** |
| G125C | CTCAACGCTCTTCCAGTCTTGGATAAAACAAGGCGGCGGCGGACCCATCGTGTTCGCCGAGTAAGAACCTGTGTGCGTTGAGAAAAACGGTCGCGCGCCATGGGGGGCGGCGGCTGAGGGATGC**C**GCGATTGTTTTTGTGCAAGGCGGTGGACGAATGACCATGAAGGGCGGGGTTGCCAGCCAGGACTTCTCGGCGGCGATCGCGACGGCTTGTGAGCCGGCGGCGAACGTC |
| C124A | CTCAACGCTCTTCCAGTCTTGGATAAAACAAGGCGGCGGCGGACCCATCGTGTTCGCCGAGTAAGAACCTGTGTGCGTTGAGAAAAACGGTCGCGCGCCATGGGGGGCGGCGGCTGAGGGATG**A**GGCGATTGTTTTTGTGCAAGGCGGTGGACGAATGACCATGAAGGGCGGGGTTGCCAGCCAGGACTTCTCGGCGGCGATCGCGACGGCTTGTGAGCCGGCGGCGAACGTC |
| G126A | CTCAACGCTCTTCCAGTCTTGGATAAAACAAGGCGGCGGCGGACCCATCGTGTTCGCCGAGTAAGAACCTGTGTGCGTTGAGAAAAACGGTCGCGCGCCATGGGGGGCGGCGGCTGAGGGATGCG**A**CGATTGTTTTTGTGCAAGGCGGTGGACGAATGACCATGAAGGGCGGGGTTGCCAGCCAGGACTTCTCGGCGGCGATCGCGACGGCTTGTGAGCCGGCGGCGAACGTC |
| C127A | CTCAACGCTCTTCCAGTCTTGGATAAAACAAGGCGGCGGCGGACCCATCGTGTTCGCCGAGTAAGAACCTGTGTGCGTTGAGAAAAACGGTCGCGCGCCATGGGGGGCGGCGGCTGAGGGATGCGG**A**GATTGTTTTTGTGCAAGGCGGTGGACGAATGACCATGAAGGGCGGGGTTGCCAGCCAGGACTTCTCGGCGGCGATCGCGACGGCTTGTGAGCCGGCGGCGAACGTC |
| U130A | CTCAACGCTCTTCCAGTCTTGGATAAAACAAGGCGGCGGCGGACCCATCGTGTTCGCCGAGTAAGAACCTGTGTGCGTTGAGAAAAACGGTCGCGCGCCATGGGGGGCGGCGGCTGAGGGATGCGGCGA**A**TGTTTTTGTGCAAGGCGGTGGACGAATGACCATGAAGGGCGGGGTTGCCAGCCAGGACTTCTCGGCGGCGATCGCGACGGCTTGTGAGCCGGCGGCGAACGTC |
| G132A | CTCAACGCTCTTCCAGTCTTGGATAAAACAAGGCGGCGGCGGACCCATCGTGTTCGCCGAGTAAGAACCTGTGTGCGTTGAGAAAAACGGTCGCGCGCCATGGGGGGCGGCGGCTGAGGGATGCGGCGATT**A**TTTTTGTGCAAGGCGGTGGACGAATGACCATGAAGGGCGGGGTTGCCAGCCAGGACTTCTCGGCGGCGATCGCGACGGCTTGTGAGCCGGCGGCGAACGTC |
| T1  (Δ2-81) | C--------------------------------------------------------------------------------GAAAAACGGTCGCGCGCCATGGGGGGCGGCGGCTGAGGGATGCGGCGATTGTTTTTGTGCA  AGGCGGTGGACGAATGACCATGAAGGGCGGGGTTGCCAGCCAGGACTTCTCGGCGGCGATCGCGACGGCTTGTGAGCCGGCGGCGAACGTC |
| T2  (Δ2-116) | C-------------------------------------------------------------------------------------------------------------------AGGGATGCGGCGATTGTTTTTGTGCA  AGGCGGTGGACGAATGACCATGAAGGGCGGGGTTGCCAGCCAGGACTTCTCGGCGGCGATCGCGACGGCTTGTGAGCCGGCGGCGAACGTC |
| T3  (Δ2-122) | C-------------------------------------------------------------------------------------------------------------------------GCGGCGATTGTTTTTGTGCA  AGGCGGTGGACGAATGACCATGAAGGGCGGGGTTGCCAGCCAGGACTTCTCGGCGGCGATCGCGACGGCTTGTGAGCCGGCGGCGAACGTC |
| T4  (Δ2-131) | C----------------------------------------------------------------------------------------------------------------------------------GTTTTTGTGCA  AGGCGGTGGACGAATGACCATGAAGGGCGGGGTTGCCAGCCAGGACTTCTCGGCGGCGATCGCGACGGCTTGTGAGCCGGCGGCGAACGTC |
| T5  (Δ2-137) | C----------------------------------------------------------------------------------------------------------------------------------------GTGCA  AGGCGGTGGACGAATGACCATGAAGGGCGGGGTTGCCAGCCAGGACTTCTCGGCGGCGATCGCGACGGCTTGTGAGCCGGCGGCGAACGTC |
| T6  (Δ2-140) | C-------------------------------------------------------------------------------------------------------------------------------------------CA  AGGCGGTGGACGAATGACCATGAAGGGCGGGGTTGCCAGCCAGGACTTCTCGGCGGCGATCGCGACGGCTTGTGAGCCGGCGGCGAACGTC |
| L1 | CTCAACGCTCTTCCAGTCTTGGATAAAACAAGGCGGCGGCGGACCCATCGTGTTCGCCGAGTAAGAACCTGTGTGCGTTGAGAAAAACGGTCGCGCGCCATGGGGGGCGGCGGCTGAGGGATGCGGCGATTG--**GAAA**--CA  AGGCGGTGGACGAATGACCATGAAGGGCGGGGTTGCCAGCCAGGACTTCTCGGCGGCGATCGCGACGGCTTGTGAGCCGGCGGCGAACGTC |
| L2 | CTCAACGCTCTTCCAGTCTTGGATAAAACAAGGCGGCGGCGGACCCATCGTGTTCGCCGAGTAAGAACCTGTGTGCGTTGAGAAAAACGGTCGCGCGCCATGGGGGGCGGCGGCTGAGGGATGCGGCGATTG--**CTCG**--CA  AGGCGGTGGACGAATGACCATGAAGGGCGGGGTTGCCAGCCAGGACTTCTCGGCGGCGATCGCGACGGCTTGTGAGCCGGCGGCGAACGTC |
| L3 | CTCAACGCTCTTCCAGTCTTGGATAAAACAAGGCGGCGGCGGACCCATCGTGTTCGCCGAGTAAGAACCTGTGTGCGTTGAGAAAAACGGTCGCGCGCCATGGGGGGCGGCGGCTGAGGGATGCGGCGATTG**AAAAA**GTGCAAGGCGGTGGACGAATGACCATGAAGGGCGGGGTTGCCAGCCAGGACTTCTCGGCGGCGATCGCGACGGCTTGTGAGCCGGCGGCGAACGTC |
| SCM1  (U157A-U163A) | CTCAACGCTCTTCCAGTCTTGGATAAAACAAGGCGGCGGCGGACCCATCGTGTTCGCCGAGTAAGAACCTGTGTGCGTTGAGAAAAACGGTCGCGCGCCATGGGGGGCGGCGGCTGAGGGATGCGGCGATTGTTTTTGTGCAAGGCGGTGGACGAA**A**GACCA**A**GAAGGGCGGGGTTGCCAGCCAGGACTTCTCGGCGGCGATCGCGACGGCTTGTGAGCCGGCGGCGAACGTC |
| SCM2  (G90U-C114A-U157A-U163A) | CTCAACGCTCTTCCAGTCTTGGATAAAACAAGGCGGCGGCGGACCCATCGTGTTCGCCGAGTAAGAACCTGTGTGCGTTGAGAAAAACG**T**TCGCGCGCCATGGGGGGCGGCGG**A**TGAGGGATGCGGCGATTGTTTTTGTGCAAGGCGGTGGACGAA**A**GACCA**A**GAAGGGCGGGGTTGCCAGCCAGGACTTCTCGGCGGCGATCGCGACGGCTTGTGAGCCGGCGGCGAACGTC |
| ΔP4  (Δ89-115) | CTCAACGCTCTTCCAGTCTTGGATAAAACAAGGCGGCGGCGGACCCATCGTGTTCGCCGAGTAAGAACCTGTGTGCGTTGAGAAAAAC---------------------------GAGGGATGCGGCGATTGTTTTTGTGCA  AGGCGGTGGACGAATGACCATGAAGGGCGGGGTTGCCAGCCAGGACTTCTCGGCGGCGATCGCGACGGCTTGTGAGCCGGCGGCGAACGTC |
| ΔP5  (Δ123-152) | CTCAACGCTCTTCCAGTCTTGGATAAAACAAGGCGGCGGCGGACCCATCGTGTTCGCCGAGTAAGAACCTGTGTGCGTTGAGAAAAACGGTCGCGCGCCATGGGGGGCGGCGGCTGAGGGAT------------------------------CGAATGACCATGAAGGGCGGGGTTGCCAGCCAGGACTTCTCGGCGGCGATCGCGACGGCTT  GTGAGCCGGCGGCGAACGTC |
| 2 x Nt | CTCAACGCTCTTCCAGTCTTGGATAAAACAAGGCGGCGGCGGACCCATCGTGTTCGCCGAGTAAGAACCTGTGTGCGTTGAGAAAAACGGTCGCGCGCCATGGGGGGCGGCGGCTGAGGGATGCGGCGATTGTTTTTGTGCAAGGCGGTGGACGAATGACCATGAAGGGCGGGGTTGCCAGCCAGGACTTCTCGGCGGCGATCGCGACGGCTTGTGAGCCGGCGGCGAACGTC**ACCATGAAGGGCGGGGTTGCCAGCCAGGACTTCTCGGCGGCGATCGCGACGGCTTGTGAGCCGGCGGCGAACGTC** |
| dfsNt | CTCAACGCTCTTCCAGTCTTGGATAAAACAAGGCGGCGGCGGACCCATCGTGTTCGCCGAGTAAGAACCTGTGTGCGTTGAGAAAAACGGTCGCGCGCCATGGGGGGCGGCGGCTGAGGGATGCGGCGATTGTTTTTGTGCAAGGCGGTGGACGAATGACCAT-AAGGGCGGGGTTGCCAGCCAGGACTTCTCGGCGGCGATCGCGACGGCTT  GTGAGCCGGCGGCGAACGTC**G** |
| dfsNt + Nt | CTCAACGCTCTTCCAGTCTTGGATAAAACAAGGCGGCGGCGGACCCATCGTGTTCGCCGAGTAAGAACCTGTGTGCGTTGAGAAAAACGGTCGCGCGCCATGGGGGGCGGCGGCTGAGGGATGCGGCGATTGTTTTTGTGCAAGGCGGTGGACGAATGACCAT-AAGGGCGGGGTTGCCAGCCAGGACTTCTCGGCGGCGATCGCGACGGCTT  GTGAGCCGGCGGCGAACGTC**GACCATGAAGGGCGGGGTTGCCAGCCAGGACTTCTCGGCGGCGATCGCGACGGCTTGTGAGCCGGCGGCGAACGTC** |
| mut D1  (Δ171-200) | CTCAACGCTCTTCCAGTCTTGGATAAAACAAGGCGGCGGCGGACCCATCGTGTTCGCCGAGTAAGAACCTGTGTGCGTTGAGAAAAACGGTCGCGCGCCATGGGGGGCGGCGGCTGAGGGATGCGGCGATTGTTTTTGTGCAAGGCGGTGGACGAATGACCATGAAGGGC------------------------------ATCGCGACGGCTT  GTGAGCCGGCGGCGAACGTC |
| mut D2  (Δ207-221) | CTCAACGCTCTTCCAGTCTTGGATAAAACAAGGCGGCGGCGGACCCATCGTGTTCGCCGAGTAAGAACCTGTGTGCGTTGAGAAAAACGGTCGCGCGCCATGGGGGGCGGCGGCTGAGGGATGCGGCGATTGTTTTTGTGCAAGGCGGTGGACGAATGACCATGAAGGGCGGGGTTGCCAGCCAGGACTTCTCGGCGGCGATCGCG-------  --------GCGGCGAACGTC |
| ΔAAI | CTCAACGCTCTTCCAGTCTTGGATAAAACAAGGCGGCGGCGGACCCATCGTGTTCGCCGAGTAAGAACCTGTGTGCGTTGAGAAAAACGGTCGCGCGCCATGGGGGGCGGCGGCTGAGGGATGCGGCGATTGTTTTTGTGCAAGGCGGTGGACGAATGACCATGAAGGGCGGGGTTGCCAGCCAGGACTTCTCG---------GCGACGGCTT  GTGAGCCGGCGGCGAACGTC |
| AAI → DDK | CTCAACGCTCTTCCAGTCTTGGATAAAACAAGGCGGCGGCGGACCCATCGTGTTCGCCGAGTAAGAACCTGTGTGCGTTGAGAAAAACGGTCGCGCGCCATGGGGGGCGGCGGCTGAGGGATGCGGCGATTGTTTTTGTGCAAGGCGGTGGACGAATGACCATGAAGGGCGGGGTTGCCAGCCAGGACTTCTCG**GACGACAAG**GCGACGGCTTGTGAGCCGGCGGCGAACGTC |
| mut CM1 | CTCAACGCTCTTCCAGTCTTGGATAAAACAAGGCGGCGGCGGACCCATCGTGTTCGCCGAGTAAGAACCTGTGTGCGTTGAGAAAAACGGTCGCGCGCCATGGGGGGCGGCGGCTGAGGGATGCGGCGATTGTTTTTGTGCAAGGCGGTGGACGAATGACCATGAAGGGCGGGGTTGCCAGCCAGGACTTCTCGGC**A**GC**A**AT**A**GCGACGGCTTGTGAGCCGGCGGCGAACGTC |
| mut CM2 | CTCAACGCTCTTCCAGTCTTGGATAAAACAAGGCGGCGGCGGACCCATCGTGTTCGCCGAGTAAGAACCTGTGTGCGTTGAGAAAAACGGTCGCGCGCCATGGGGGGCGGCGGCTGAGGGATGCGGCGATTGTTTTTGTGCAAGGCGGTGGACGAATGACCATGAAGGGCGGGGTTGCCAGCCAGGACTTCTCGGC**C**GC**C**ATCGCGACGGCTTGTGAGCCGGCGGCGAACGTC |
| mut 1  (KGG → ADD) | CTCAACGCTCTTCCAGTCTTGGATAAAACAAGGCGGCGGCGGACCCATCGTGTTCGCCGAGTAAGAACCTGTGTGCGTTGAGAAAAACGGTCGCGCGCCATGGGGGGCGGCGGCTGAGGGATGCGGCGATTGTTTTTGTGCAAGGCGGTGGACGAATGACCATG**GCGGACGAC**GTTGCCAGCCAGGACTTCTCGGCGGCGATCGCGACGGCTTGTGAGCCGGCGGCGAACGTC |
| mut 2  (ΔKGG) | CTCAACGCTCTTCCAGTCTTGGATAAAACAAGGCGGCGGCGGACCCATCGTGTTCGCCGAGTAAGAACCTGTGTGCGTTGAGAAAAACGGTCGCGCGCCATGGGGGGCGGCGGCTGAGGGATGCGGCGATTGTTTTTGTGCAAGGCGGTGGACGAATGACCATG---------GTTGCCAGCCAGGACTTCTCGGCGGCGATCGCGACGGCTT  GTGAGCCGGCGGCGAACGTC |
| mut 3  (ΔKGGVA) | CTCAACGCTCTTCCAGTCTTGGATAAAACAAGGCGGCGGCGGACCCATCGTGTTCGCCGAGTAAGAACCTGTGTGCGTTGAGAAAAACGGTCGCGCGCCATGGGGGGCGGCGGCTGAGGGATGCGGCGATTGTTTTTGTGCAAGGCGGTGGACGAATGACCATG---------------AGCCAGGACTTCTCGGCGGCGATCGCGACGGCTT  GTGAGCCGGCGGCGAACGTC |
| mut 4  (ΔGV) | CTCAACGCTCTTCCAGTCTTGGATAAAACAAGGCGGCGGCGGACCCATCGTGTTCGCCGAGTAAGAACCTGTGTGCGTTGAGAAAAACGGTCGCGCGCCATGGGGGGCGGCGGCTGAGGGATGCGGCGATTGTTTTTGTGCAAGGCGGTGGACGAATGACCATGAAGGGC------GCCAGCCAGGACTTCTCGGCGGCGATCGCGACGGCTT  GTGAGCCGGCGGCGAACGTC |
| mut 5  (ΔQ10 + ΔS13) | CTCAACGCTCTTCCAGTCTTGGATAAAACAAGGCGGCGGCGGACCCATCGTGTTCGCCGAGTAAGAACCTGTGTGCGTTGAGAAAAACGGTCGCGCGCCATGGGGGGCGGCGGCTGAGGGATGCGGCGATTGTTTTTGTGCAAGGCGGTGGACGAATGACCATGAAGGGCGGGGTTGCCAGC---GACTTC---GCGGCGATCGCGACGGCTT  GTGAGCCGGCGGCGAACGTC |
| mut 6  (DF → LN) | CTCAACGCTCTTCCAGTCTTGGATAAAACAAGGCGGCGGCGGACCCATCGTGTTCGCCGAGTAAGAACCTGTGTGCGTTGAGAAAAACGGTCGCGCGCCATGGGGGGCGGCGGCTGAGGGATGCGGCGATTGTTTTTGTGCAAGGCGGTGGACGAATGACCATGAAGGGCGGGGTTGCCAGCCAG**CTCAAC**TCGGCGGCGATCGCGACGGCTTGTGAGCCGGCGGC |
