# Supplementary figures and images for: A nascent polypeptide sequence modulates DnaA translation elongation in response to nutrient availability
Source: eLife journal article supplement (doi:10.7554/elife.71611), 2021-08-31

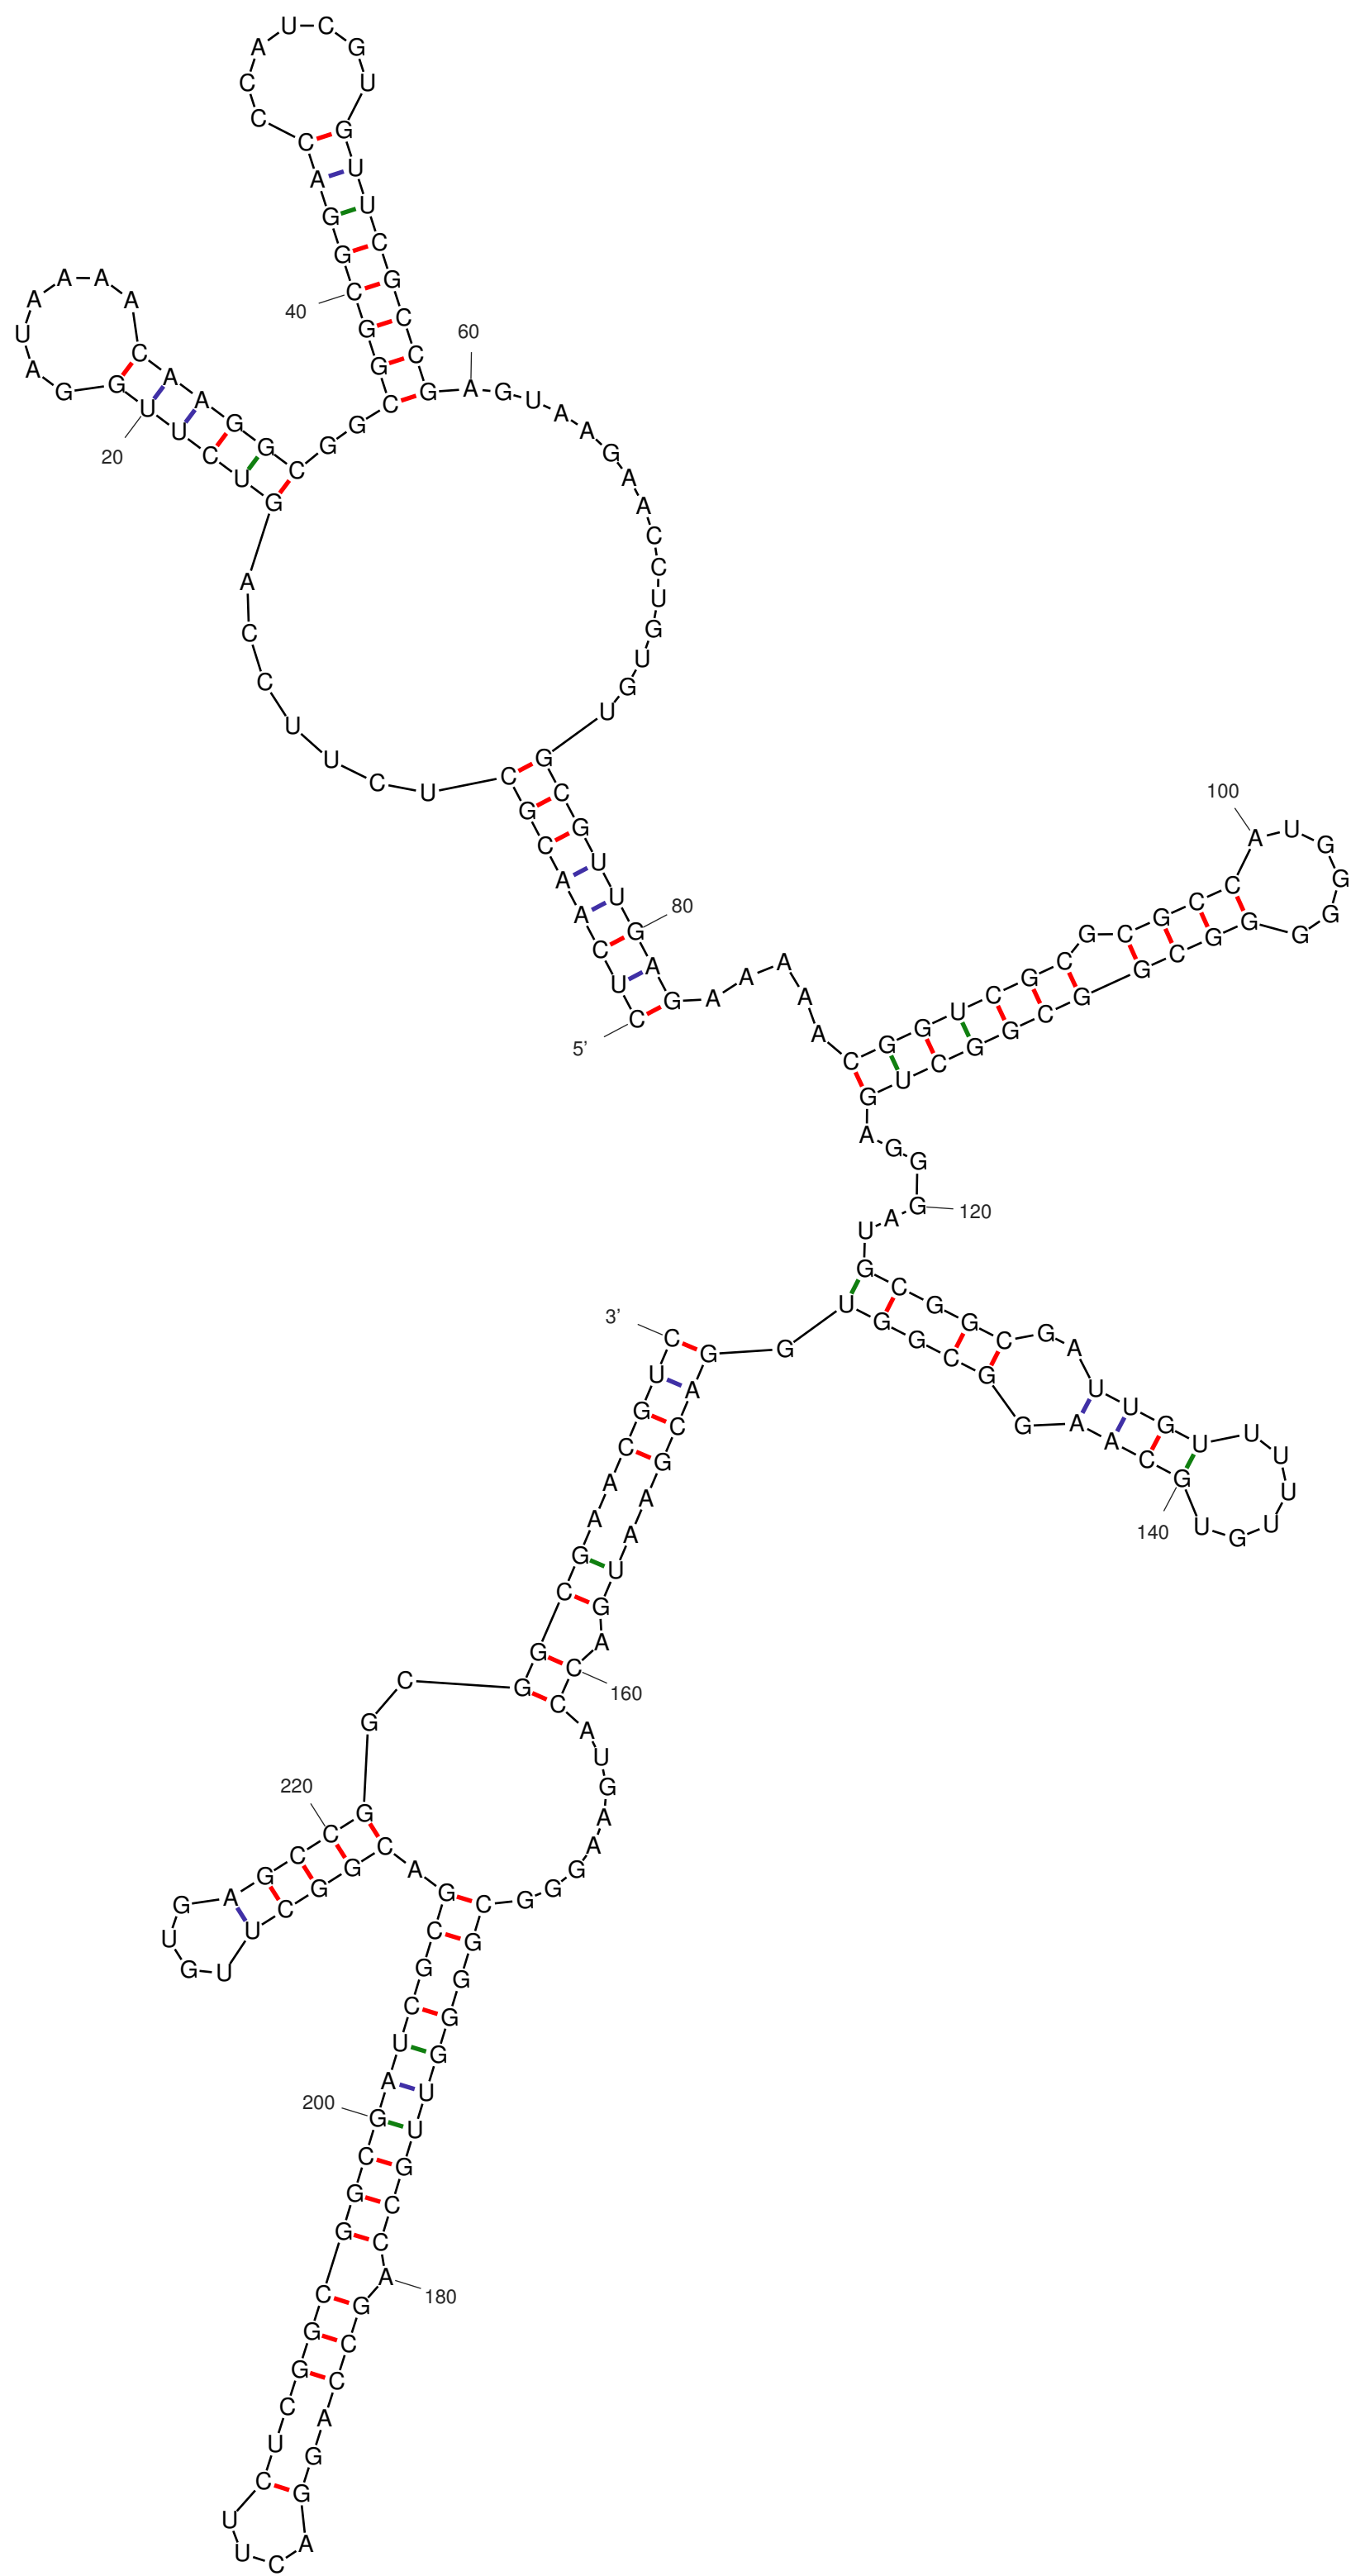

*dG = -89.11 [Initially -94.50] 19Mar01-10-27-50*

Supplement: fig1-figsupp1-data1 [file 19Mar01-10-27-50_233.pdf › Figure 1-figure supplement 1-source data 1/mFold_ViennaRNA_predictions/19Mar01-10-27-50_233.pdf]

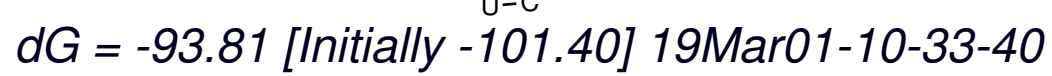

Supplement: fig1-figsupp1-data1 [file 19Mar01-10-33-40_253.pdf › Figure 1-figure supplement 1-source data 1/mFold_ViennaRNA_predictions/19Mar01-10-33-40_253.pdf]

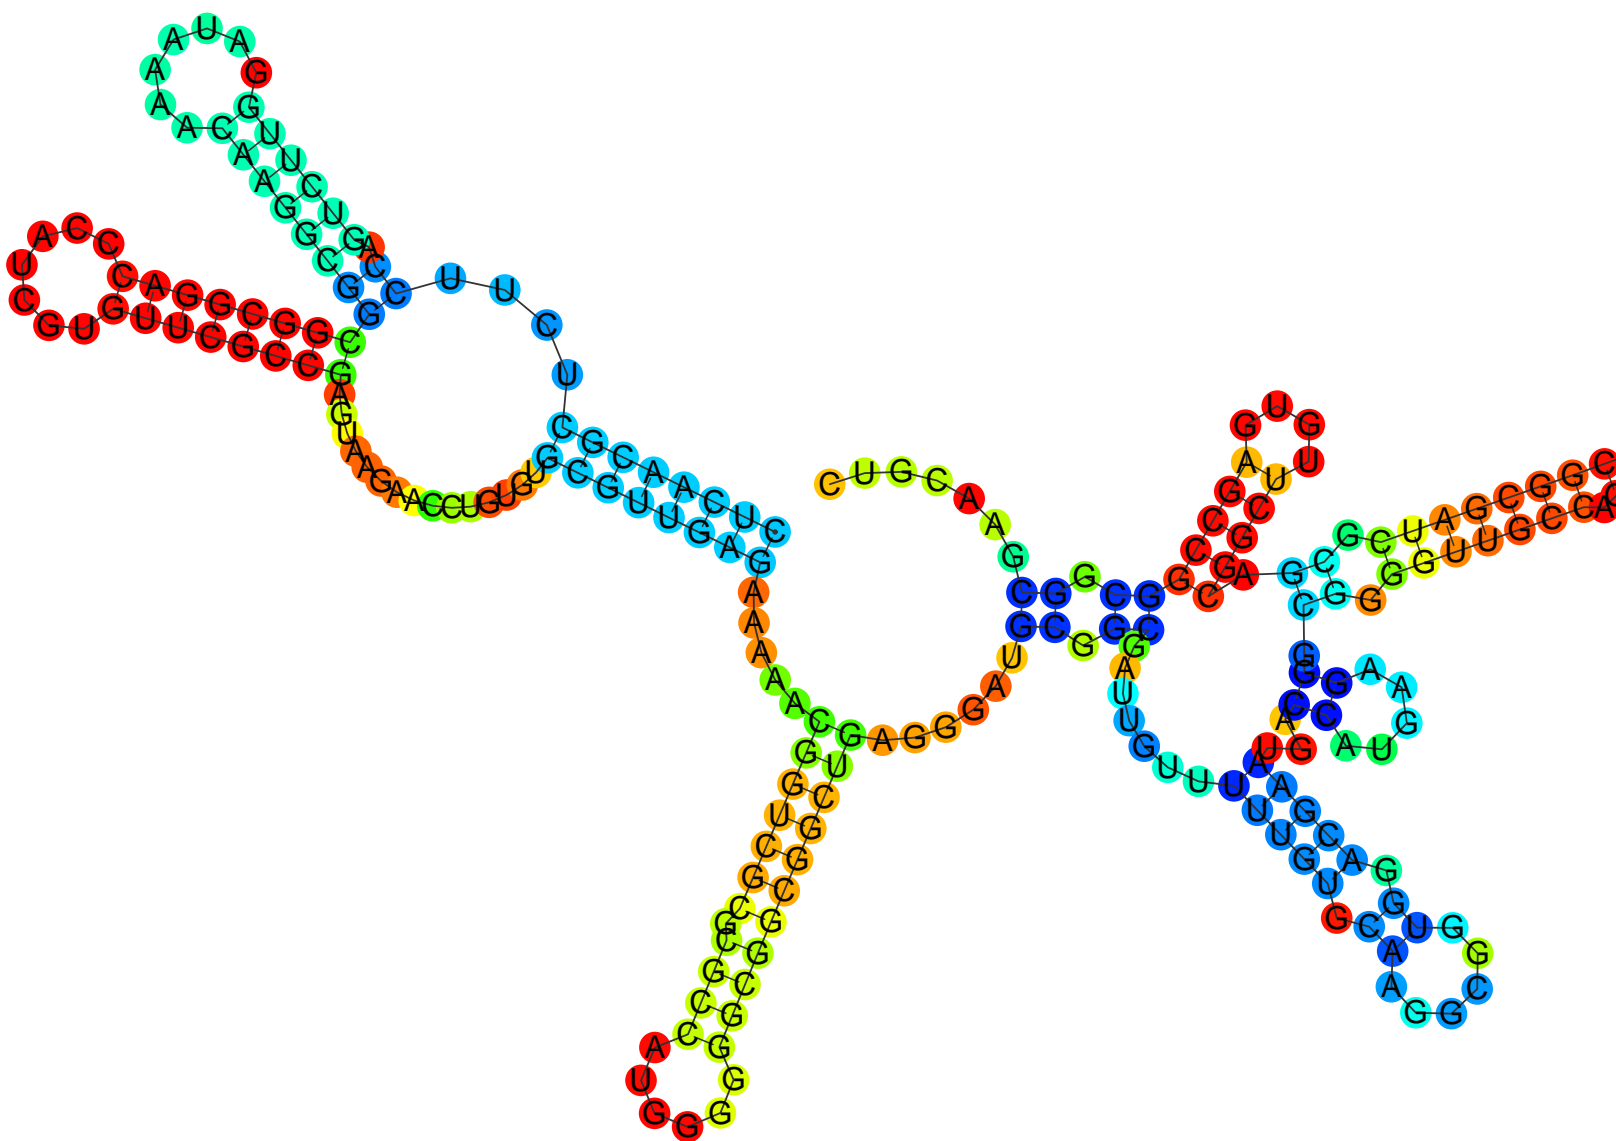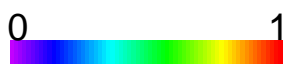

Supplement: fig1-figsupp1-data1 [file ViennaRNA233.pdf › Figure 1-figure supplement 1-source data 1/mFold_ViennaRNA_predictions/ViennaRNA233.pdf]

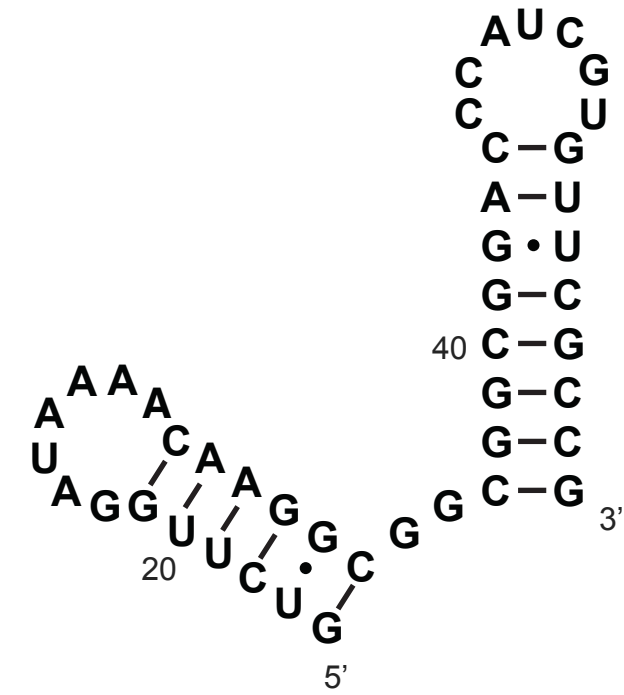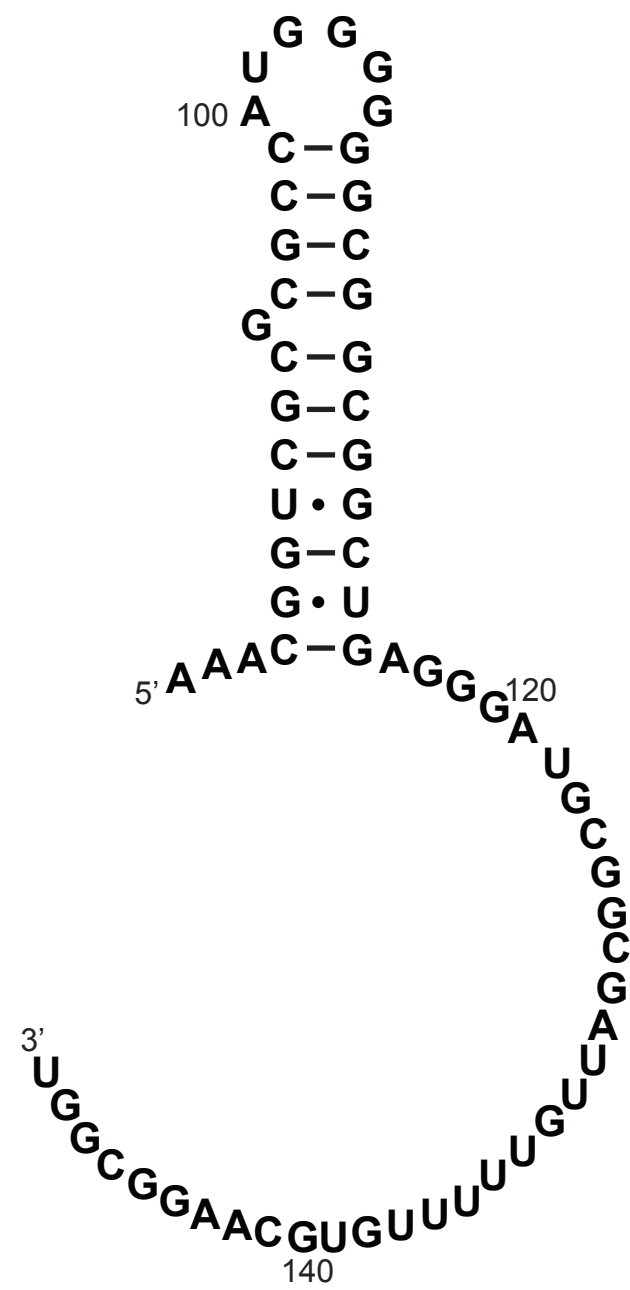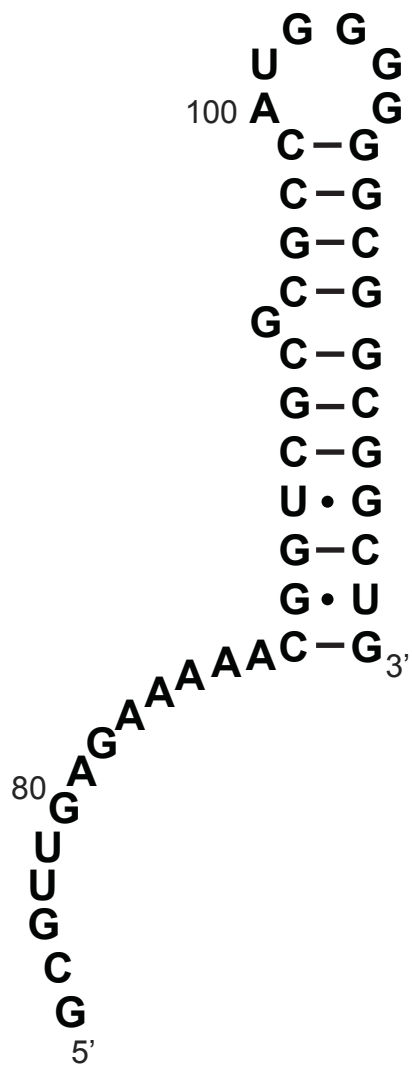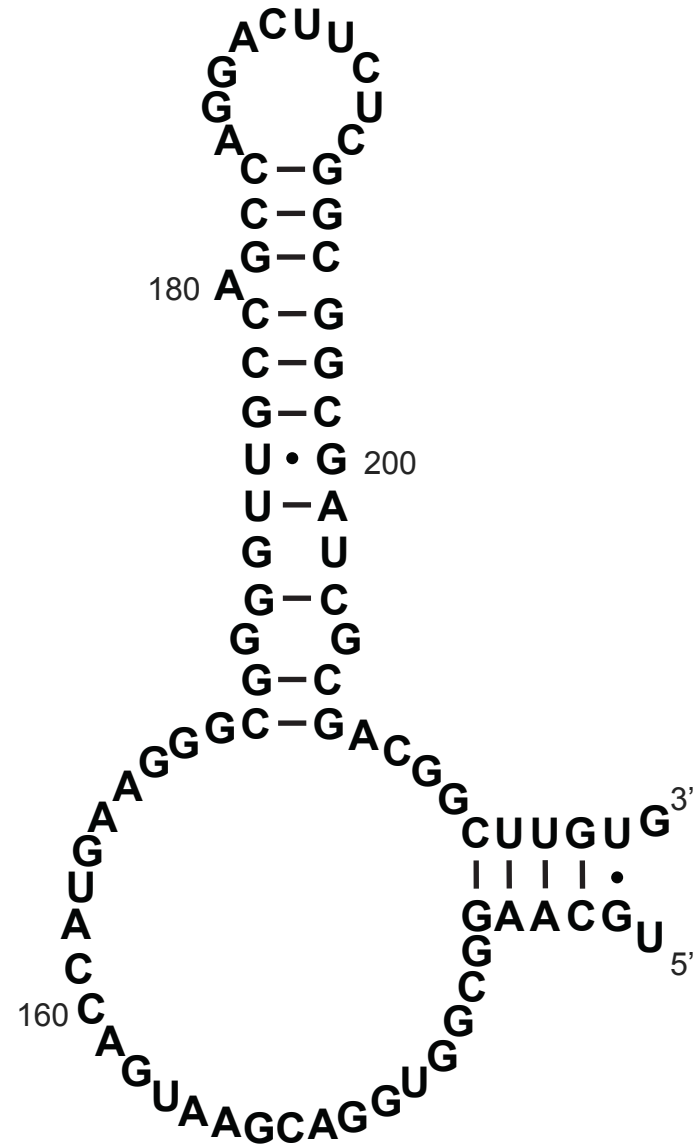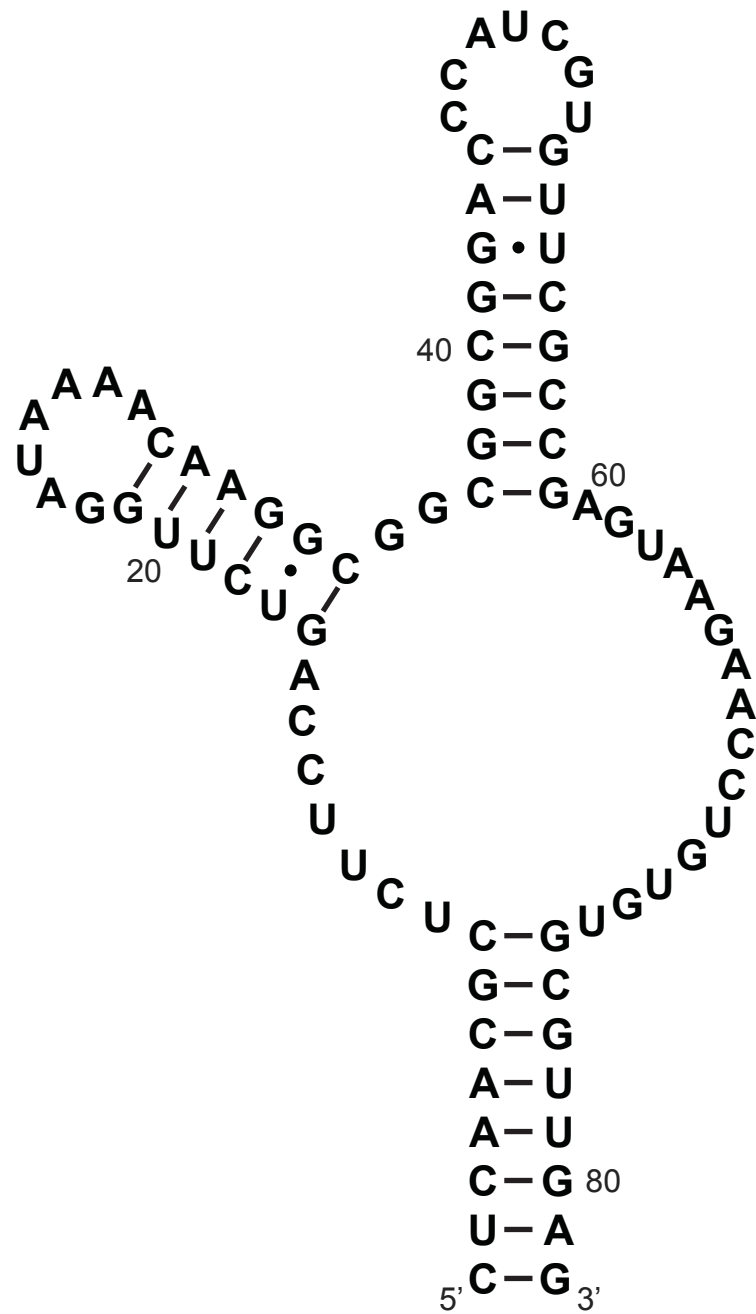

Supplement: fig1-figsupp2-data1 [file h2.pdf › Figure 1-figure supplement 2-source data 1/panel B/CMfinder_results/all/h2.pdf]

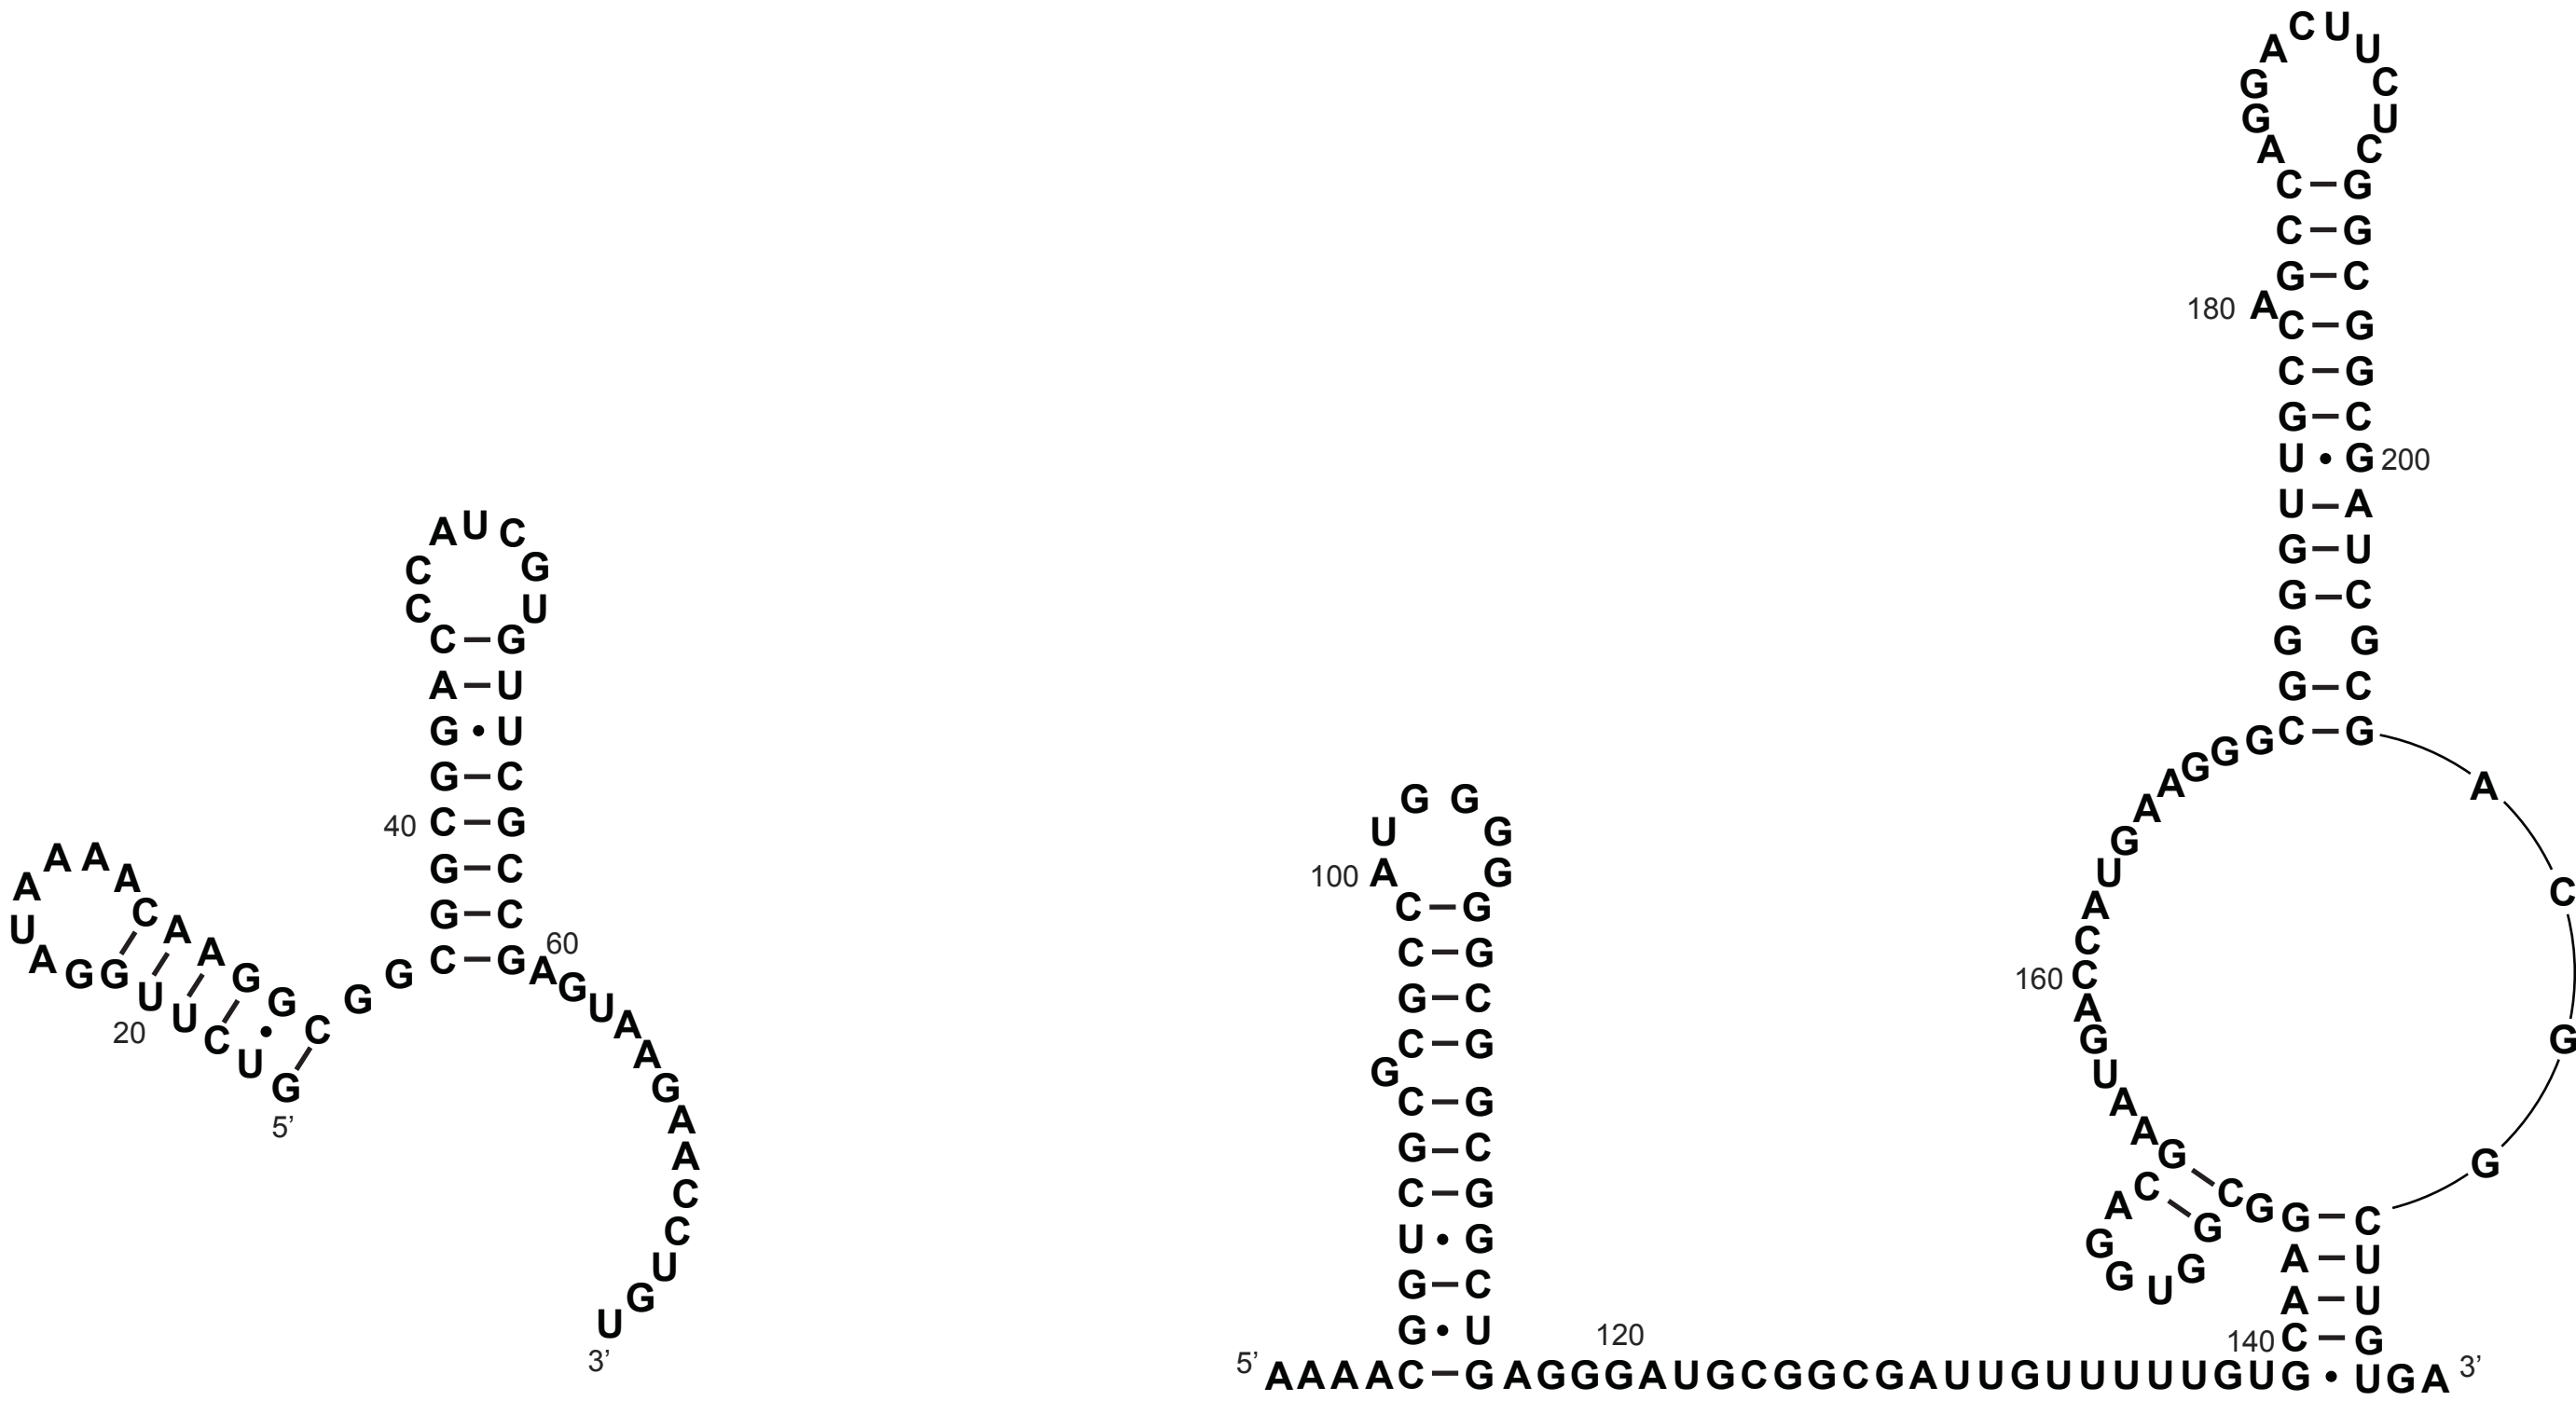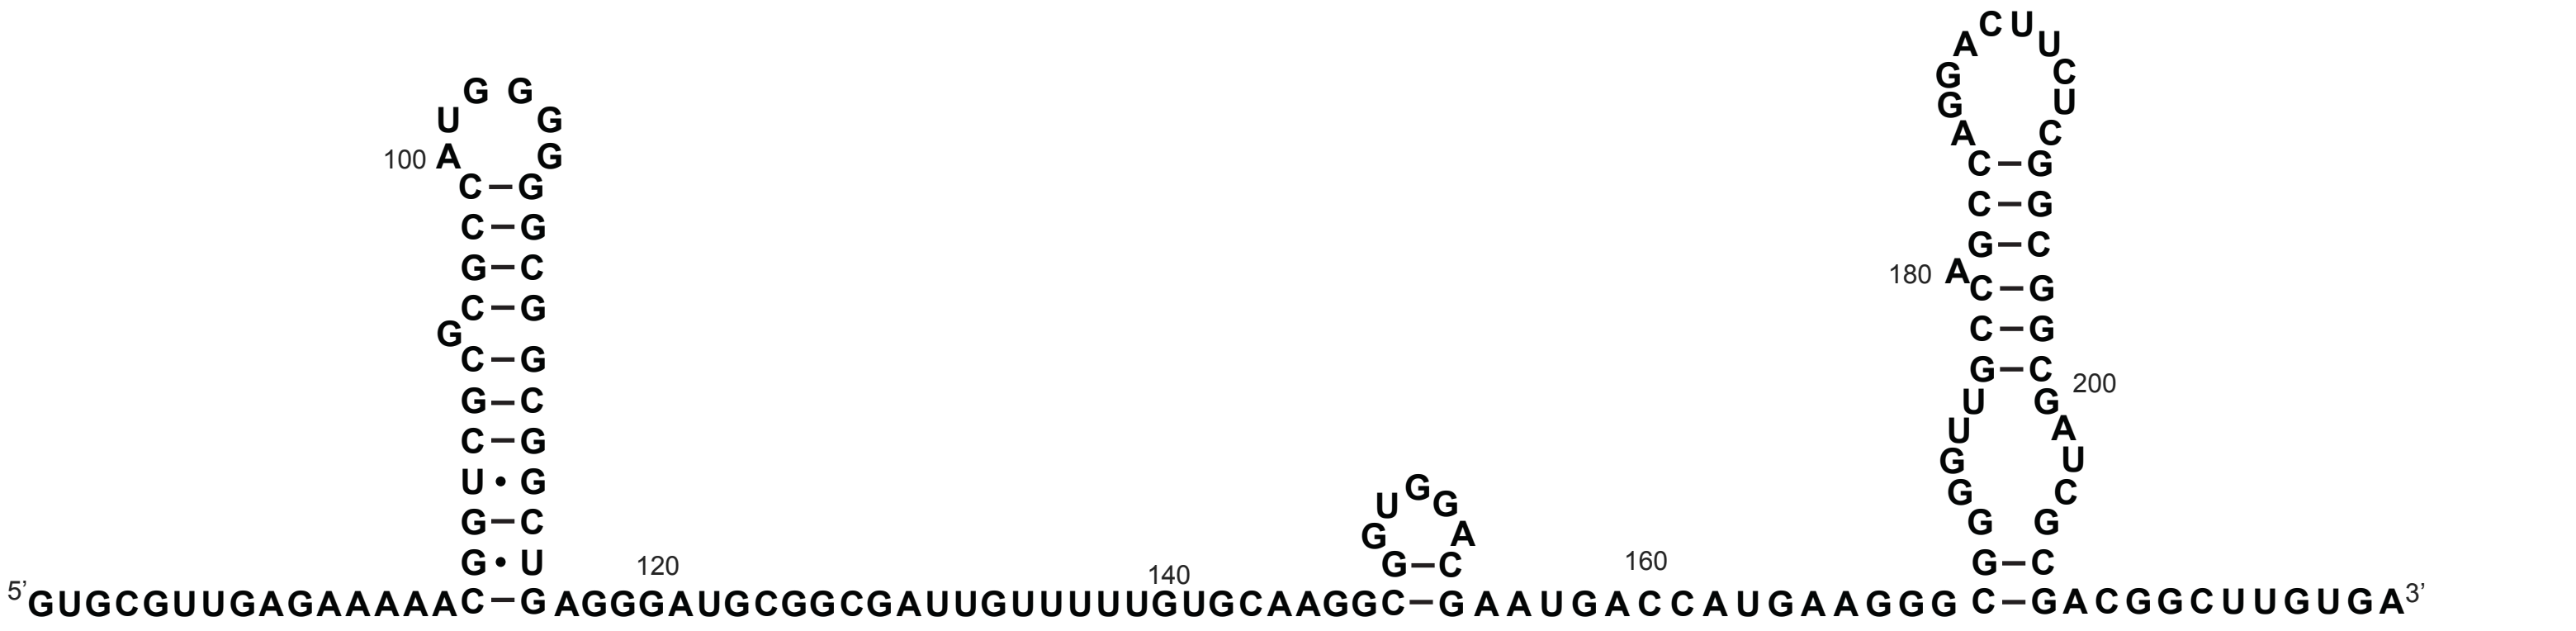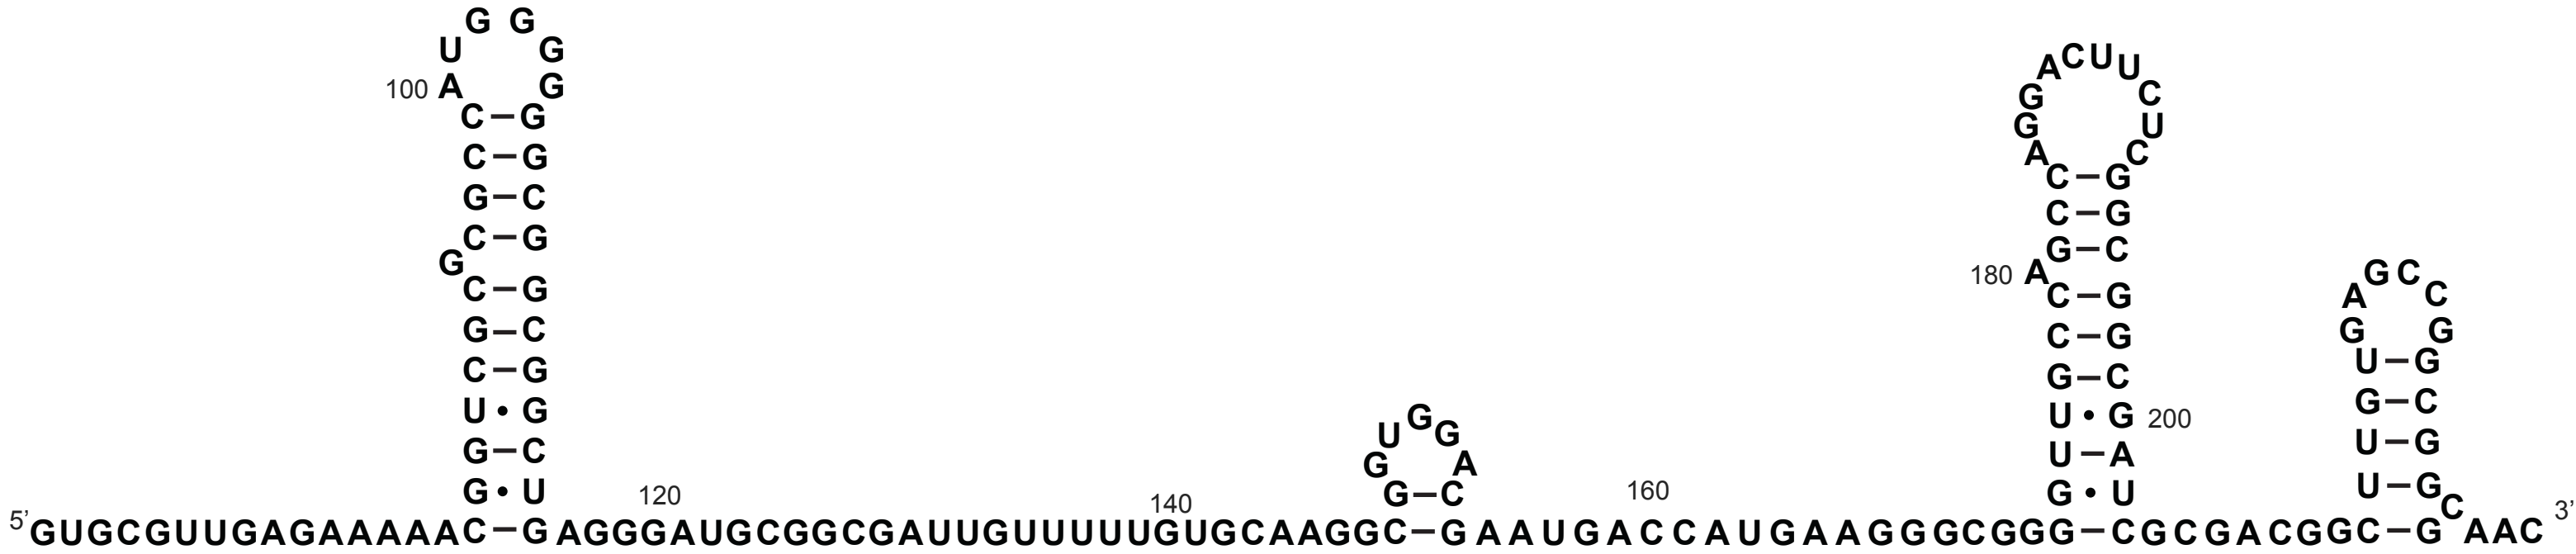

Supplement: fig1-figsupp2-data1 [file combined.pdf › Figure 1-figure supplement 2-source data 1/panel B/CMfinder_results/subgroup1/combined.pdf]



Supplement: fig1-figsupp2-data1 [file combined.pdf › Figure 1-figure supplement 2-source data 1/panel B/CMfinder_results/subgroup2/combined.pdf]
